# Supplementary material for: Exome sequencing-driven discovery of coding polymorphisms associated with common metabolic phenotypes
Source: PubMed Central journal article supplement (PMC3536959; doi:10.1007/s00125-012-2756-1), 2012-11-19
Supplement: 125_2012_2756_MOESM11_ESM.pdf [file 125_2012_2756_MOESM11_ESM.pdf]

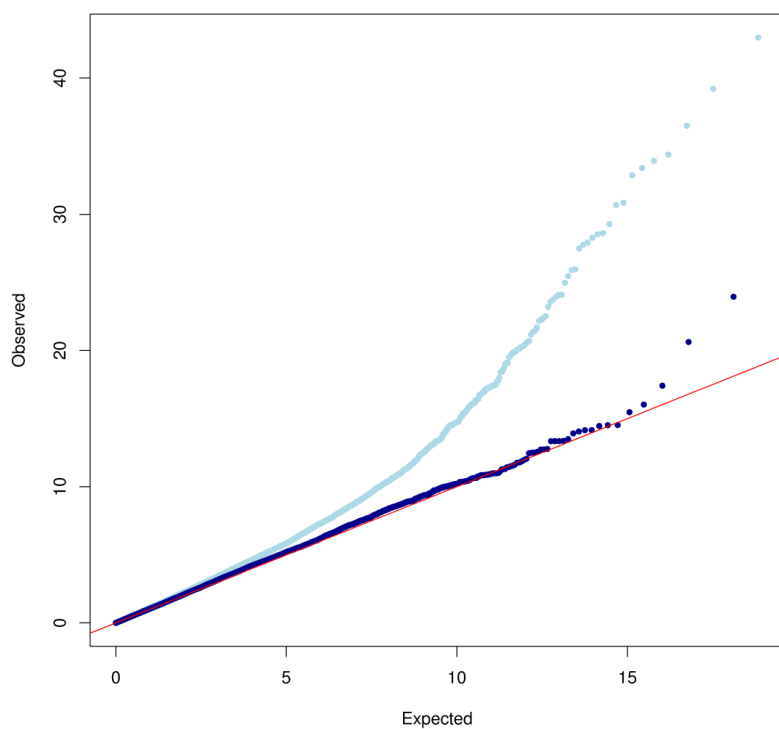

**ESM Figure 9 Quantile-quantile plot of test statistics from sequenced-derived SNPs in 1,000 metabolic cases and 1,000 healthy controls (stage 1).**

The plot shows the test statistics of all sequenced derived SNPs ( $n = 70,182$ , light blue dots) and the test statistics after the exclusion of SNPs that correlate with a time-dependent bias ( $n = 48,035$ , dark blue dots) (ESM Methods section 2.6). After the filtering the inflation rate ( $\lambda_{GC}$ ) was 1.05.
