# Supplementary material for: Exome sequencing-driven discovery of coding polymorphisms associated with common metabolic phenotypes
Source: PubMed Central journal article supplement (PMC3536959; doi:10.1007/s00125-012-2756-1), 2012-11-19
Supplement: 125_2012_2756_MOESM14_ESM.pdf [file 125_2012_2756_MOESM14_ESM.pdf]

| Top 10 |           |          |            |             |         |         |
|--------|-----------|----------|------------|-------------|---------|---------|
| chr    | pos       | rs       | gene       | st1.p.value | q.value | p.value |
| 6      | 117351067 | 7770158  | RFXDC1     | 0.027       | 0.69    | 0.00086 |
| 4      | 108860749 | 973126   | PAPSS1     | 0.0096      | 0.69    | 0.00097 |
| 9      | 89690225  | 7850542  | C9orf79    | 0.048       | 0.69    | 0.0017  |
| 16     | 24485959  | 7195386  | RBBP6      | 0.019       | 0.69    | 0.0021  |
| 1      | 154959759 | 1133856  | ISG20L2    | 0.018       | 0.69    | 0.0024  |
| 1      | 15313616  | 34135602 | RP1-21O18. | 0.047       | 0.69    | 0.0037  |
| 19     | 63202962  | 10451433 | ZNF606     | 0.019       | 0.69    | 0.0038  |
| 19     | 50087554  | 157581   | TOMM40     | 0.04        | 0.69    | 0.0039  |
| 12     | 51224562  | 61708395 | KRT71      | 0.032       | 0.69    | 0.0043  |
| 9      | 89692827  | 11789780 | C9orf79    | 0.032       | 0.69    | 0.0049  |

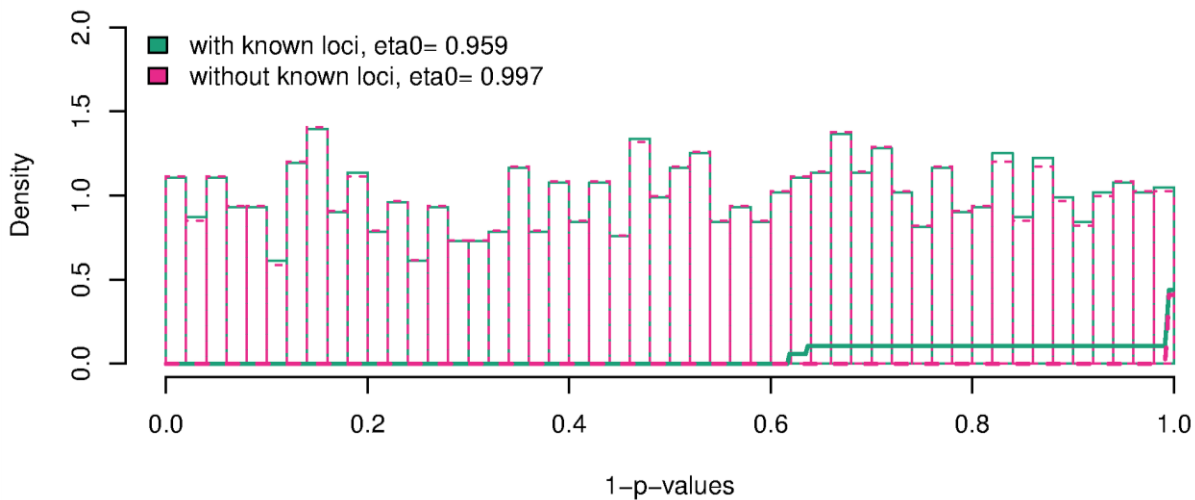

**ESM Figure 12 The top associations with obesity in stage 2 of the SNPs selected based on their association ( $P < 0.05$ ) in stage 1.**

The  $P$ -value from stage 1 (st.1.p.value) is shown alongside the  $P$ -value for stage 2 (p.value) estimated without the 2,000 individuals from stage 1. The local false positive rate (q-value) was estimated from the genomic control-corrected  $P$ -values.  $P$ -values have not been corrected for multiple testing. The bottom figure shows the histogram of the  $P$ -values with or without the known associated loci. A mixture model with two components was fitted to the data and the distribution of the associated component is shown in the histogram. \*known locus associated with metabolic phenotypes.
