# Supplementary material for: Exome sequencing-driven discovery of coding polymorphisms associated with common metabolic phenotypes
Source: PubMed Central journal article supplement (PMC3536959; doi:10.1007/s00125-012-2756-1), 2012-11-19
Supplement: 125_2012_2756_MOESM16_ESM.pdf [file 125_2012_2756_MOESM16_ESM.pdf]

### Binary traits

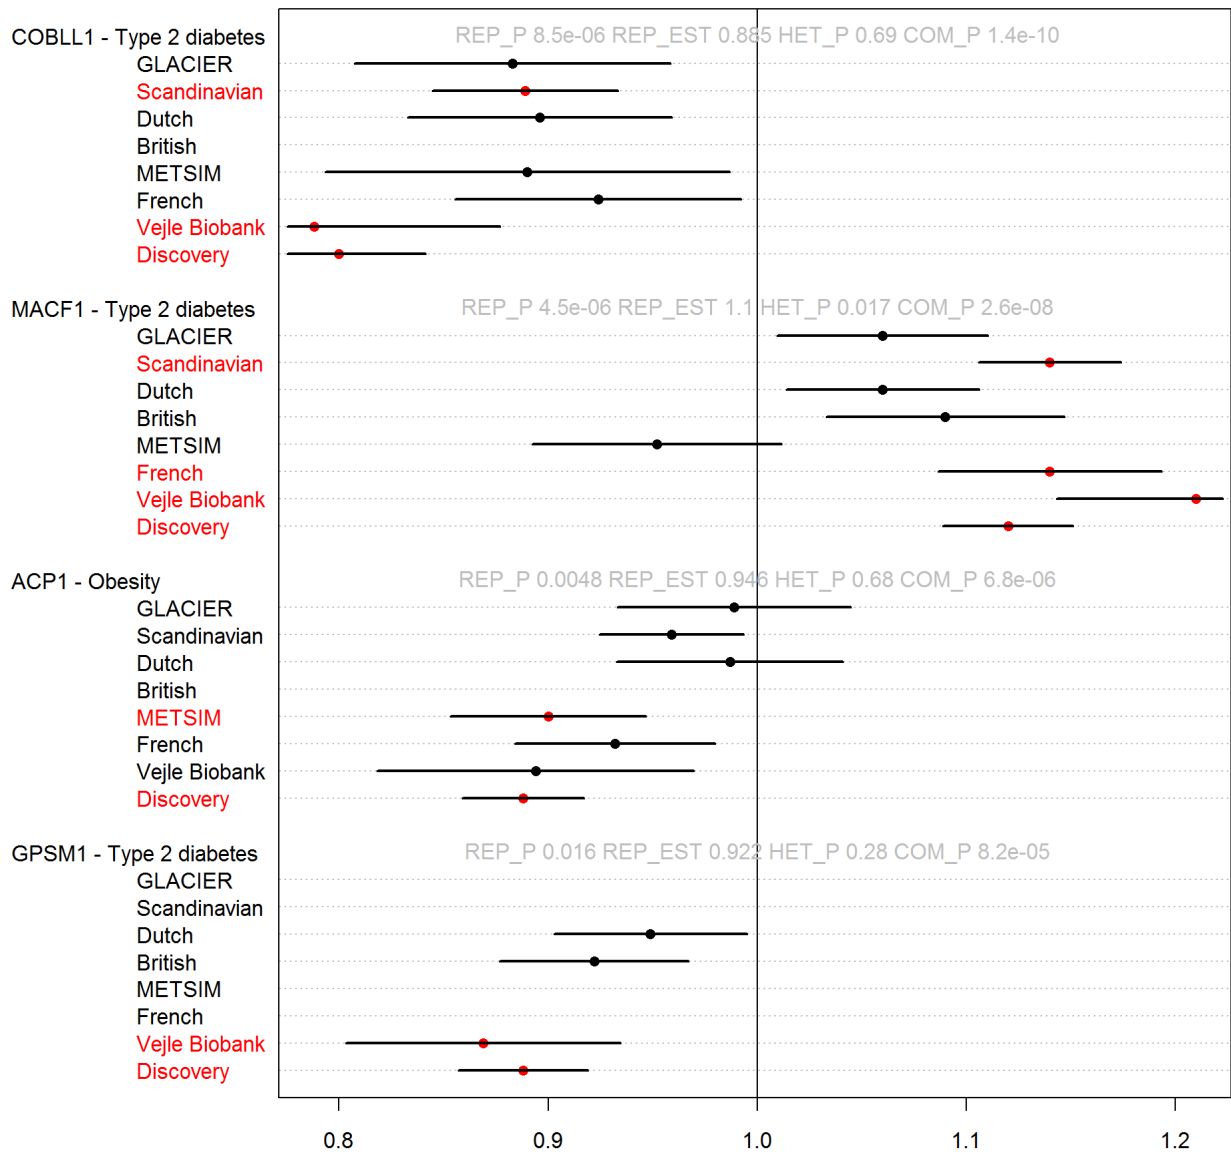

**ESM Figure 14 Replication of selected coding SNPs with binary metabolic phenotypes in stage 3 European samples.**

For each association is shown the effect in discovery (stage 2) samples and the cohort-specific replication effect. In red are studies with a nominally significant association ( $P < 0.05$ ). Data are OR and SE. REP\_P:  $P$ -value in replication samples, REP\_EST: Effect size (OR) in replication samples, HET\_P:  $P$ -value for heterogeneity in replication samples, COM\_P: Combined  $P$ -value.
