# Supplementary material for: Exome sequencing-driven discovery of coding polymorphisms associated with common metabolic phenotypes
Source: Springer Nature journal article supplement (doi:10.1007/s00125-012-2756-1), 2012-11-17
Supplement: MOESM3 [file 8091254]

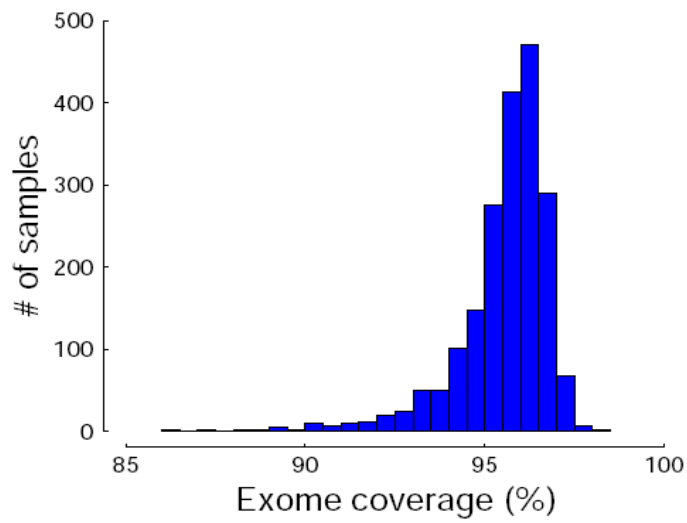

**ESM Figure 1 Distribution of exome target region coverage in the 2,000 Danish samples.**

The distribution of exome coverage was plotted using the effective reads before filtering poor quality reads. The exome coverage was defined as the number of bases (%) covered by at least one uniquely mapped read for each base and the median coverage per individual was calculated to 96%.
