# Supplementary material for: Exome sequencing-driven discovery of coding polymorphisms associated with common metabolic phenotypes
Source: Springer Nature journal article supplement (doi:10.1007/s00125-012-2756-1), 2012-11-17
Supplement: MOESM5 [file 8091254]

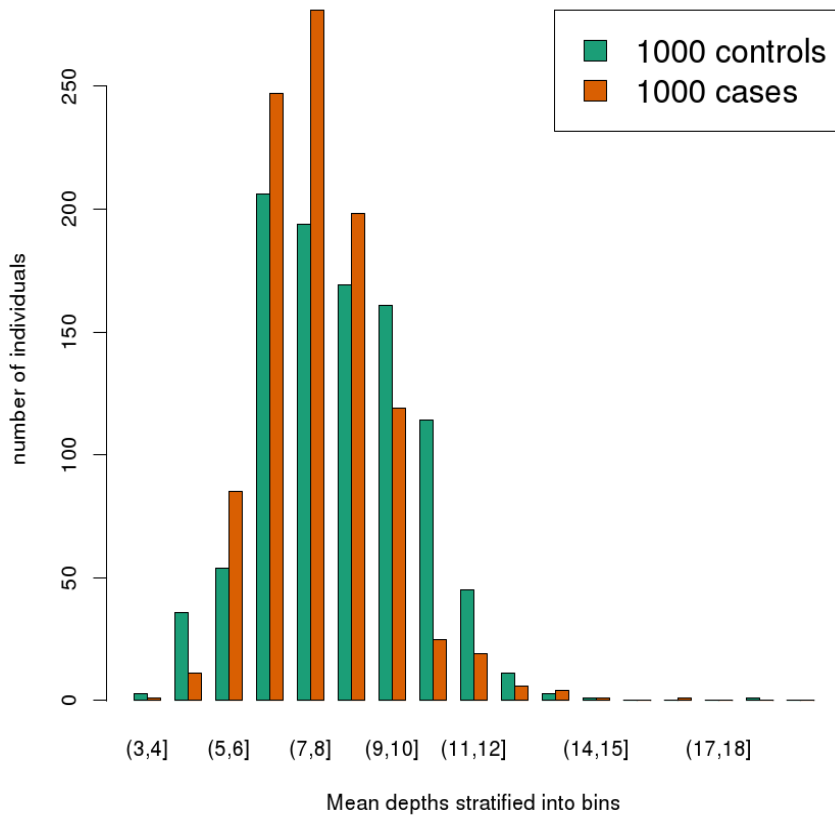

**ESM Figure 3 The average depths distribution in 1,000 cases and 1,000 controls after removal of low quality bases.**
