# Supplementary material for: Exome sequencing-driven discovery of coding polymorphisms associated with common metabolic phenotypes
Source: Springer Nature journal article supplement (doi:10.1007/s00125-012-2756-1), 2012-11-17
Supplement: MOESM7 [file 8091254]

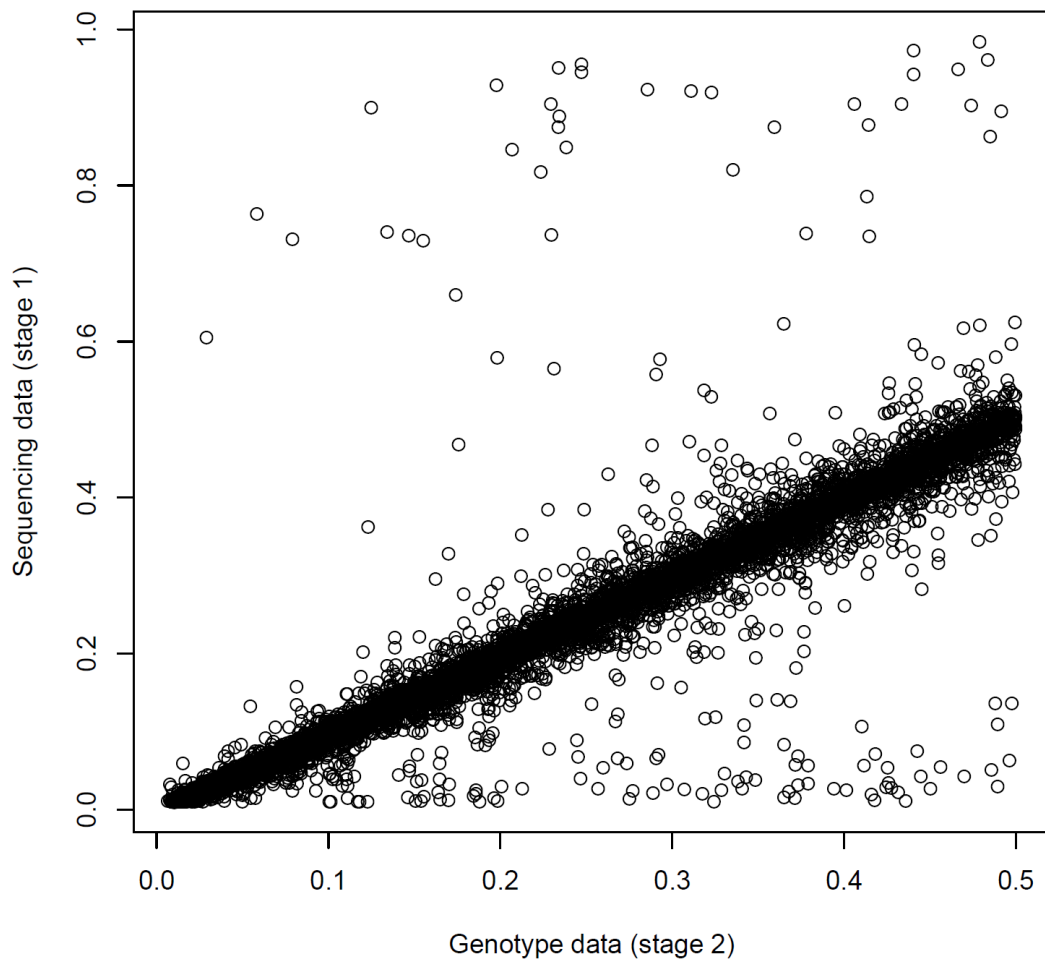

**ESM Figure 5 Comparison of allele frequencies from exome sequencing with chip genotyping**

Allele frequencies from exome sequencing (stage 1) compared with allele frequencies for the same SNPs and same individuals in genotyping data (stage 2). Only few outliers are observed suggesting accurate allele frequency estimation in exome sequencing data.
