# Supplementary material for: Exome sequencing-driven discovery of coding polymorphisms associated with common metabolic phenotypes
Source: Springer Nature journal article supplement (doi:10.1007/s00125-012-2756-1), 2012-11-17
Supplement: MOESM10 [file 8091254]

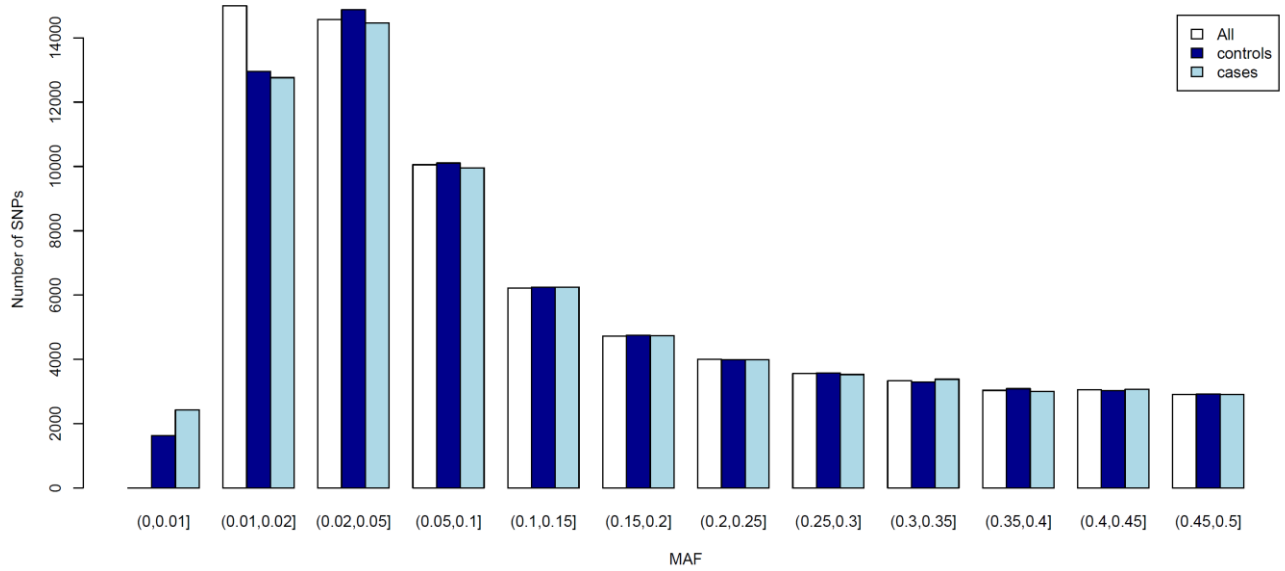

**ESM Figure 8 Allele distribution for the inferred polymorphic sites.**

The frequency distribution is also shown for cases and controls separately.
