# Supplementary material for: Exome sequencing-driven discovery of coding polymorphisms associated with common metabolic phenotypes
Source: Springer Nature journal article supplement (doi:10.1007/s00125-012-2756-1), 2012-11-17
Supplement: MOESM13 [file 8091254]

| Top 10 |           |          |            |             |         |         |
|--------|-----------|----------|------------|-------------|---------|---------|
| chr    | pos       | rs       | gene       | st1.p.value | q.value | p.value |
| 2      | 165259447 | 7607980  | COBLL1     | 0.015       | 0.0081  | 4.8e-06 |
| 4 *    | 6354988   | 1046316  | WFS1,LOC10 | 0.011       | 0.2     | 0.00028 |
| 1      | 203395942 | 1062715  | RIPK5      | 0.032       | 0.26    | 0.00059 |
| 2      | 65152343  | 17849707 | CEP68      | 0.037       | 0.28    | 0.00086 |
| 19     | 59938624  | 16985907 | KIR3DL3    | 0.0017      | 0.29    | 0.0011  |
| 2 *    | 27584444  | 1260326  | GCKR       | 0.0042      | 0.3     | 0.0011  |
| 1      | 1837839   | 28581776 | CALML6     | 0.034       | 0.31    | 0.0014  |
| 6      | 117351067 | 7770158  | RFXDC1     | 0.027       | 0.31    | 0.0017  |
| 22     | 44102562  | 62001863 | FAM118A    | 0.017       | 0.31    | 0.0017  |
| 11     | 60935861  | 3019198  | FLJ12529   | 0.00073     | 0.32    | 0.0019  |

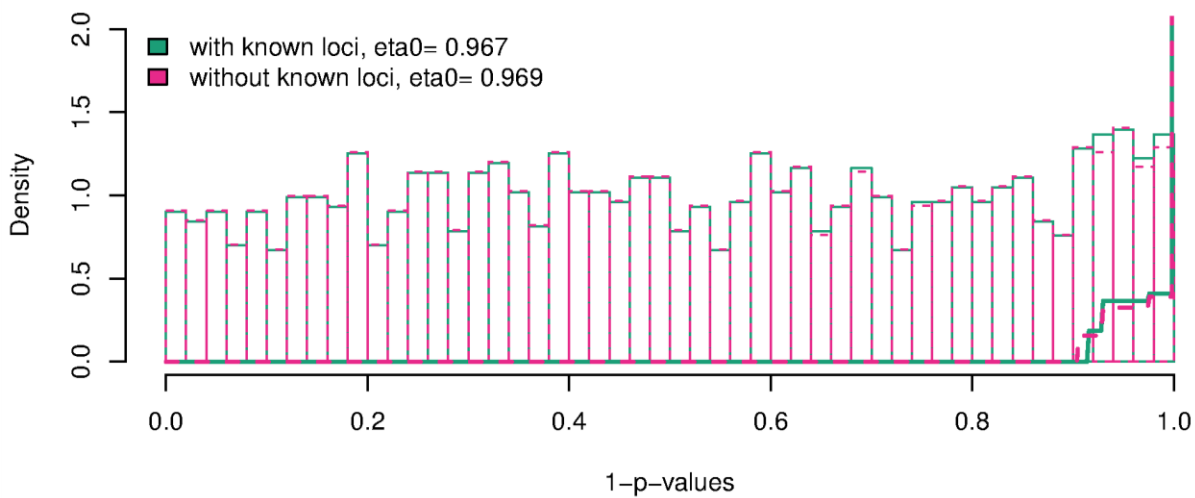

**ESM Figure 11 The top associations with type 2 diabetes in stage 2 of the SNPs selected from stage 1 based on association ( $P < 0.05$ ) in stage 1.**

The  $P$ -value from stage 1 (st.1.p.value) is shown alongside the  $P$ -value for stage 2 (p.value) estimated without the 2,000 individuals from stage 1. The local false positive rate (q-value) was estimated from the genomic control-corrected  $P$ -values.  $P$ -values have not been corrected for multiple testing. The bottom figure shows the histogram of the  $P$ -values with or without the known associated loci. A mixture model with two components was fitted to the data and the distribution of the associated component is shown in the histogram. \*known locus associated with metabolic phenotypes.
