# Supplementary material for: Exome sequencing-driven discovery of coding polymorphisms associated with common metabolic phenotypes
Source: Springer Nature journal article supplement (doi:10.1007/s00125-012-2756-1), 2012-11-17
Supplement: MOESM15 [file 8091254]

| Top 10 |          |          |           |             |         |         |
|--------|----------|----------|-----------|-------------|---------|---------|
| chr    | pos      | rs       | gene      | st1.p.value | q.value | p.value |
| 1      | 28436839 | 8559     | ATPIF1    | 0.0059      | 0.7     | 0.00059 |
| 16     | 68525398 | 2270841  | WWP2      | 0.042       | 0.7     | 0.0013  |
| 17     | 5279005  | 56014026 | C1QBP     | 0.034       | 0.7     | 0.0013  |
| 21     | 30724639 | 2226548  | KRTAP13-4 | 0.026       | 0.7     | 0.0028  |
| 8      | 20073257 | 17092129 | SLC18A1   | 0.003       | 0.7     | 0.0031  |
| 14     | 51578813 | 17831525 | NID2      | 0.031       | 0.7     | 0.0033  |
| 22     | 17280868 | 16983347 | PRODH     | 0.031       | 0.7     | 0.0035  |
| 17     | 11724196 |          | DNAH9     | 0.012       | 0.7     | 0.0042  |
| 3      | 16243990 | 14576    | GALNTL2   | 0.027       | 0.7     | 0.0043  |
| 17     | 19753133 | 203462   | AKAP10    | 0.027       | 0.7     | 0.006   |

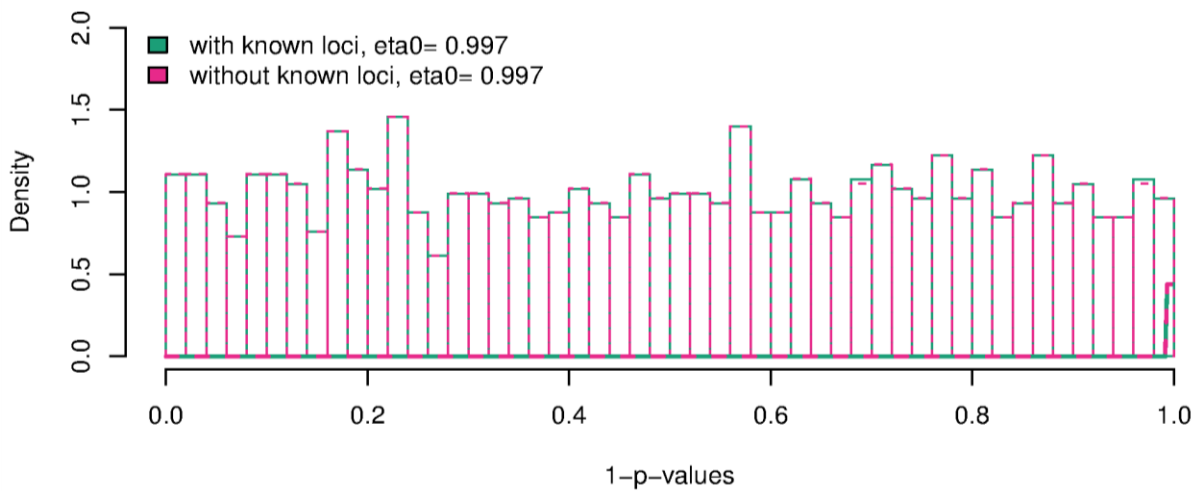

**ESM Figure 13 The top associations with hypertension in stage 2 of the SNPs selected based on their association ( $P < 0.05$ ) in stage 1.**

The  $P$ -value from stage 1 (st.1.p.value) is shown alongside the  $P$ -value for stage 2 (p.value) estimated without the 2,000 individuals from stage 1. The local false positive rate (q-value) was estimated from the genomic control-corrected  $P$ -values.  $P$ -values have not been corrected for multiple testing. The bottom figure shows the histogram of the  $P$ -values with or without the known associated loci. A mixture model with two components was fitted to the data and the distribution of the associated component is shown in the histogram. \*known locus associated with metabolic phenotypes.
