# Supplementary material for: Exome sequencing-driven discovery of coding polymorphisms associated with common metabolic phenotypes
Source: Springer Nature journal article supplement (doi:10.1007/s00125-012-2756-1), 2012-11-17
Supplement: MOESM17 [file 8091254]

### Quantitative traits

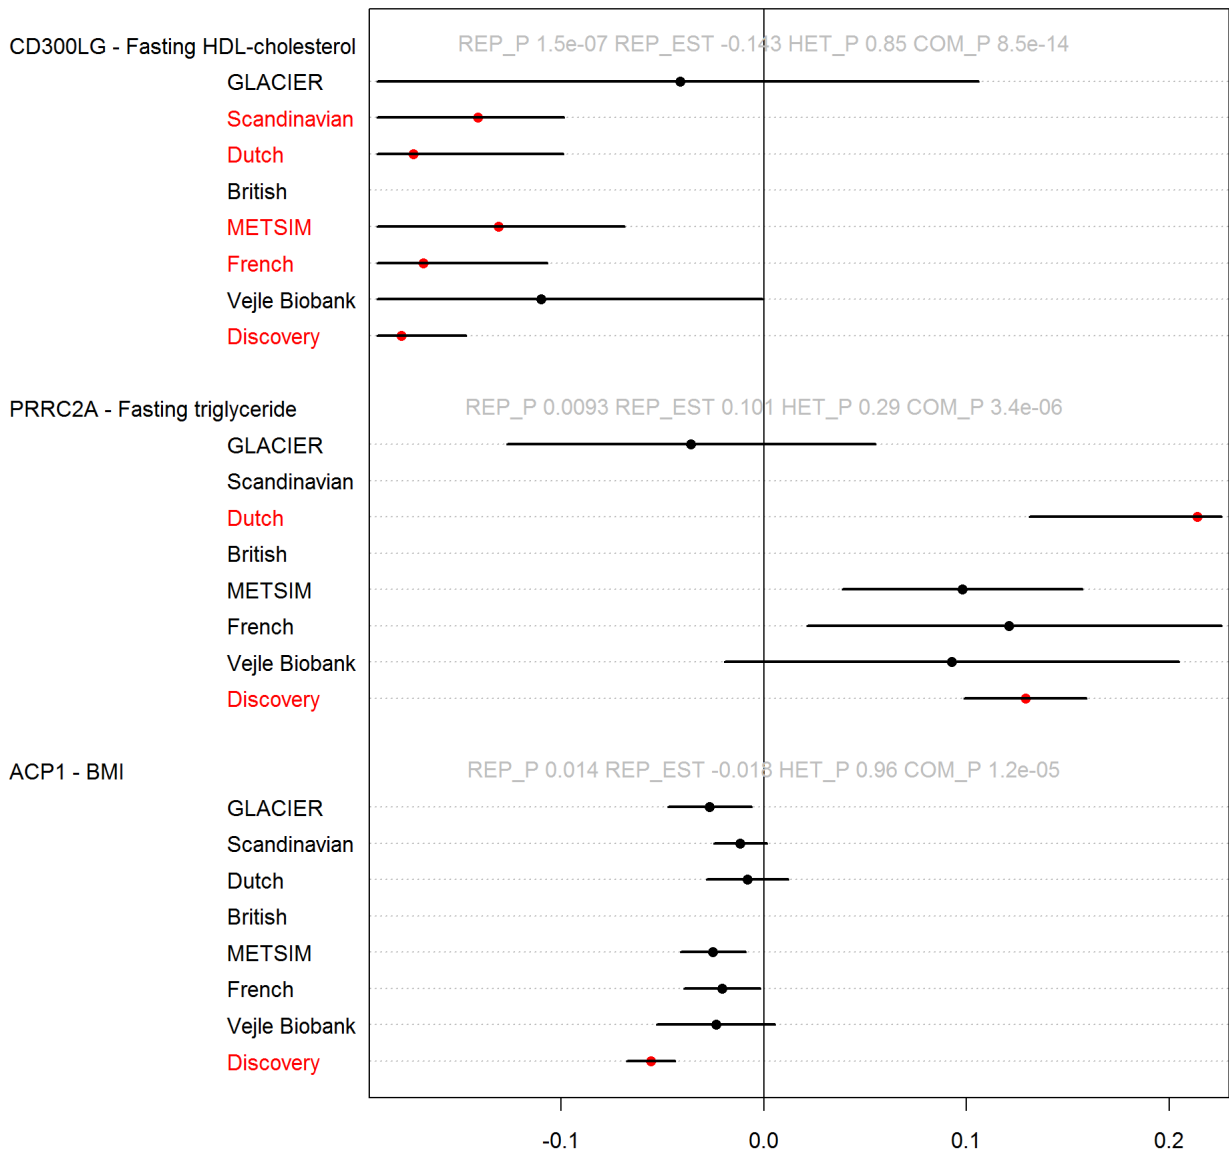

**ESM Figure 15 Replication of selected coding SNPs with quantitative metabolic phenotypes in stage 3 European samples.**

For each association is shown the effect in discovery (stage 2) samples and the cohort-specific replication effect. In red are studies with a nominally significant association ( $P < 0.05$ ). Data are effect and SE on a rank normalized scale. REP\_P:  $P$ -value in replication samples, REP\_EST: Effect size (on rank normalized scale) in replication samples, HET\_P:  $P$ -value for heterogeneity in replication samples, COM\_P: Combined  $P$ -value.
