# Supplementary material for: Exome sequencing-driven discovery of coding polymorphisms associated with common metabolic phenotypes
Source: Springer Nature journal article supplement (doi:10.1007/s00125-012-2756-1), 2012-11-17
Supplement: MOESM18 [file 8091254]

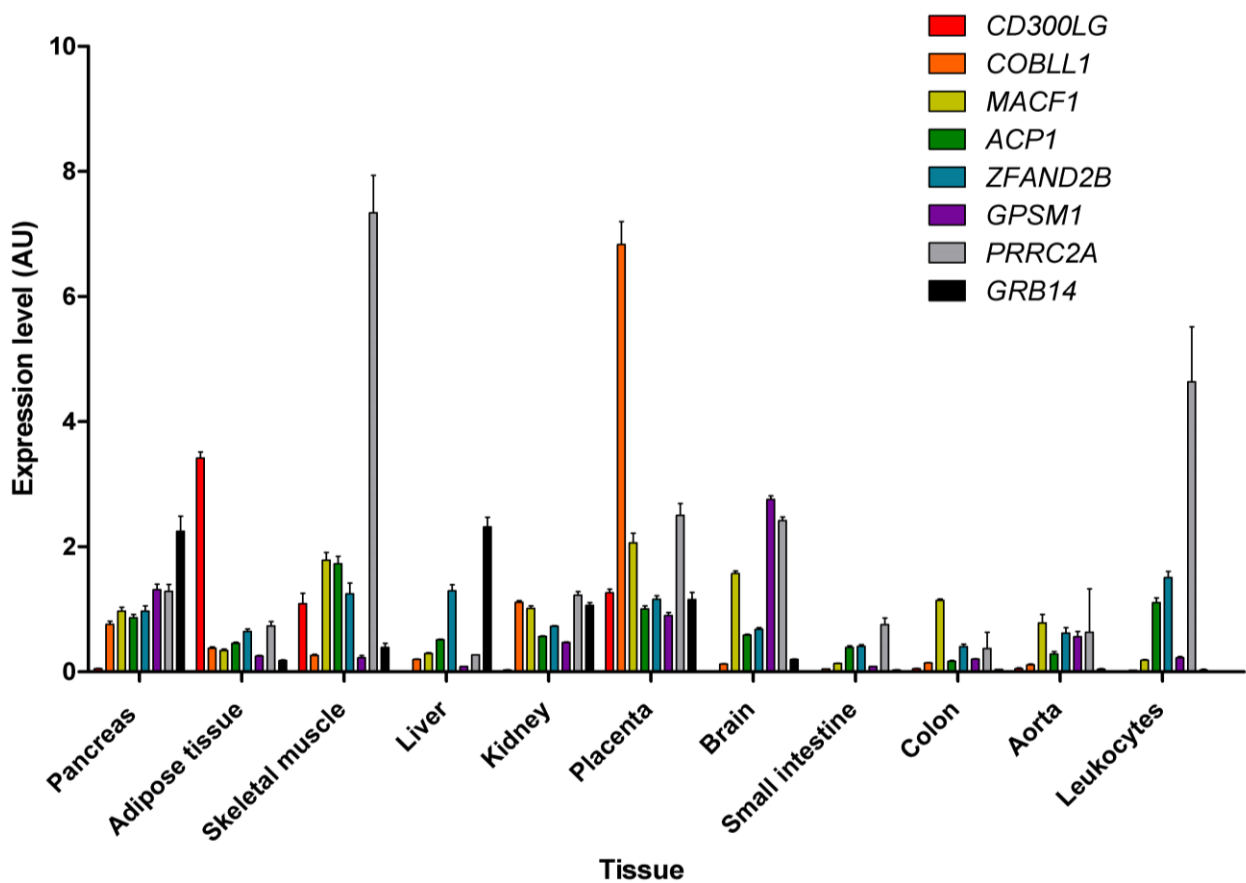

**ESM Figure 16 Tissue expression of genes containing coding variants associated with metabolic traits.**

Expression levels of *CD300LG*, *COBLL1*, *MACF1*, *ACP1*, *ZFAND2B*, *GPSM1*, *PRRC2A* and *GRB14* were quantified in duplicates by TaqMan real-time PCR in a human tissue mRNA panel including pancreas, adipose tissue, skeletal muscle, liver, kidney, placenta, total brain, total small intestine, colon, aorta and leukocytes. Results are presented as mean  $\pm$  SD.
