# Supplementary material for: Exome sequencing-driven discovery of coding polymorphisms associated with common metabolic phenotypes
Source: Springer Nature journal article supplement (doi:10.1007/s00125-012-2756-1), 2012-11-17
Supplement: MOESM19 [file 8091254]

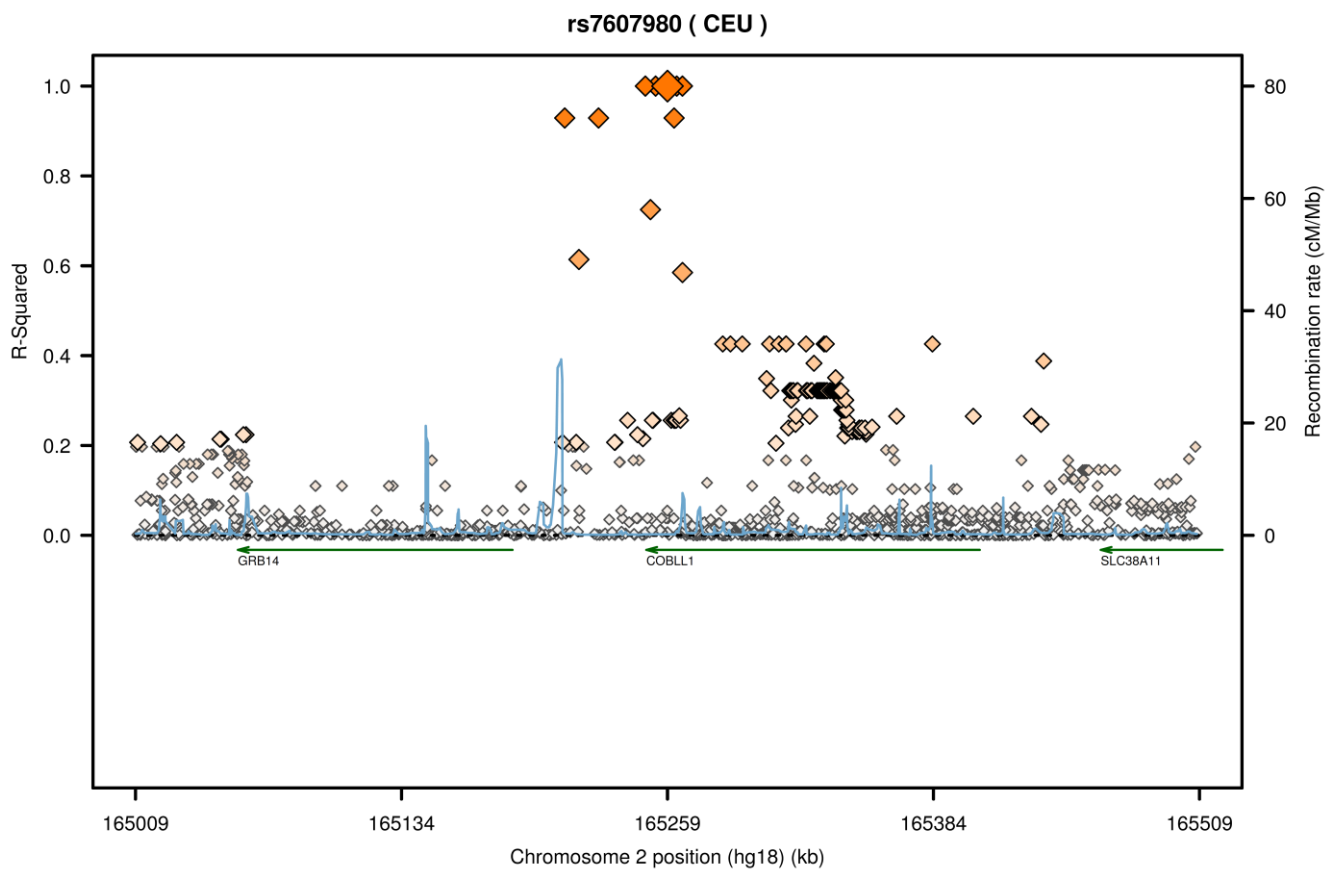

**ESM Figure 17 Linkage disequilibrium between sequence variants in the COBLL1/GRB14 region**

Plot of linkage disequilibrium ( $r^2$ ) with rs7607980 for SNPs located +/- 250 kb from rs7608980 based on data from 1000 Genomes Project. Size and colour of the diamonds indicate the level of LD with rs7608980 as high ( $r^2 > 0.5$ ) in orange, medium ( $0.5 > r^2 > 0.2$ ) in light orange and low ( $r^2 < 0.2$ ) in pale. The blue line displays the recombination rate. The plot was made using SNAP (<http://www.broadinstitute.org/mpg/snap/>; Johnson, A. D., Handsaker, R. E., Pulit, S., Nizzari, M. M., O'Donnell, C. J., de Bakker, P. I. W.

SNAP: A web-based tool for identification and annotation of proxy SNPs using HapMap. *Bioinformatics*, 2008 24(24):2938-2939
