# Supplementary material for: Exome sequencing-driven discovery of coding polymorphisms associated with common metabolic phenotypes
Source: Springer Nature journal article supplement (doi:10.1007/s00125-012-2756-1), 2012-11-17
Supplement: MOESM20 [file 8091254]

**ESM Table 1 Clinical and biochemical characteristics of five study groups involved in discovery studies of stage 1 and/or stage 2**

|                                        | Inter99       | Steno Diabetes Center | ADDITION      | Health2006    | Vejle Biobank |
|----------------------------------------|---------------|-----------------------|---------------|---------------|---------------|
| N                                      | 5887          | 2154                  | 3711          | 2902          | 1335          |
| Sex (M/W)                              | 2892/2995     | 1303/851              | 1960/1751     | 1311/1591     | 676/659       |
| Age (years)                            | 46.1 ± 7.9    | 61.8 ± 11             | 59.5 ± 7      | 49.2 ± 13     | 61.1 ± 10     |
| HbA <sub>1c</sub> (%)                  | 5.8 (5.5-6.1) | 5.8 (5.5-6.2)         | 5.9 (5.6-6.3) | 5.4 (5.1-5.6) | 6.3 (5.5-7.2) |
| BMI (kg/m <sup>2</sup> )               | 26.3 ± 4.6    | 28.3 ± 5.4            | 32.2 ± 4.7    | 26 ± 4.7      | 26.5 ± 5.7    |
| Waist circumference (cm)               | 86.6 ± 13     | 96.7 ± 16             | 106 ± 12      | 88.8 ± 14     | 93.7 ± 16     |
| Fasting plasma glucose (mmol/l)        | 5.53 ± 0.79   | 5.24 ± 1              | NA            | 5.44 ± 0.62   | 5.11 ± 0.32   |
| Fasting serum cholesterol (mmol/l)     | 5.52 ± 1.1    | 5.63 ± 1.2            | 5.8 ± 1.1     | 5.35 ± 1.1    | 4.6 ± 0.99    |
| Fasting serum HDL-cholesterol (mmol/l) | 1.44 ± 0.4    | 1.25 ± 0.43           | 1.44 ± 0.38   | 1.54 ± 0.43   | 1.45 ± 0.44   |
| Fasting serum triacylglycerol (mmol/l) | 1.1 (0.8-1.5) | 1.5 (1-2.3)           | 1.5 (1.1-2.0) | 1.1 (0.8-1.5) | 1.2 (0.9-1.8) |
| Systolic blood pressure (mmHg)         | 129 (120-140) | 137 (123-153)         | 140 (130-151) | 126 (117-138) | 144 (130-159) |
| Diastolic blood pressure (mmHg)        | 80 (75-90)    | 79 (72-86)            | 85 (80-90)    | 80 (74-88)    | 84 (77-91)    |

Data are mean ± SD for normally distributed traits or median (interquartile range). The different Danish study samples are described in ESM Methods section 1.1.
