# Supplementary material for: Exome sequencing-driven discovery of coding polymorphisms associated with common metabolic phenotypes
Source: Springer Nature journal article supplement (doi:10.1007/s00125-012-2756-1), 2012-11-17
Supplement: MOESM21 [file 8091254]

**ESM Table 2 Clinical and biochemical characteristics of 2,000 individuals involved in exome sequencing**

|                                              | Metabolic cases  | Controls       |
|----------------------------------------------|------------------|----------------|
| N                                            | 1000             | 1000           |
| N (Inter99)                                  | 36               | 851            |
| N (Steno Diabetes Center)                    | 610              | 149            |
| N (ADDITION)                                 | 354              | 0              |
| N (Health2006)                               | 0                | 0              |
| N (Vejle Biobank)                            | 0                | 0              |
| Sex (M/W)                                    | 499/501          | 501/499        |
| Age (years)                                  | 58.3 ± 8.5       | 50.7 ± 6.7     |
| Age at diagnosis of type 2 diabetes (years)* | 49.4 (43.7-54.1) | -              |
| HbA <sub>1c</sub> (%)                        | 6.7 (6.1-8.1)    | 5.8 (5.5-6.1)  |
| BMI (kg/m <sup>2</sup> )                     | 33.8 ± 4.9       | 23.5 ± 2.1     |
| Waist circumference (cm)                     | 111 ± 12         | 80.4 ± 9.1     |
| Fasting plasma glucose (mmol/l)              | 9.9 ± 3.6        | 5.1 ± 0.3      |
| Fasting serum cholesterol (mmol/l)           | 5.9 ± 1.1        | 5.5 ± 1.0      |
| Fasting serum HDL-cholesterol (mmol/l)       | 1.3 ± 0.35       | 1.6 ± 0.42     |
| Fasting serum triacylglycerol (mmol/l)       | 1.8 (1.4-2.5)    | 0.90 (0.7-1.2) |
| Systolic blood pressure (mmHg)               | 150 (140-160)    | 125 (115-133)  |
| Diastolic blood pressure (mmHg)              | 90 (85-95)       | 80 (71-85)     |

Description of 1,000 cases and 1,000 control individual participating in the exome sequencing. Data are mean ± SD for normally distributed traits and median (interquartile range).

\* Age at diagnosis is only given for patients with clinical-onset type 2 diabetes
