# Supplementary material for: Exome sequencing-driven discovery of coding polymorphisms associated with common metabolic phenotypes
Source: Springer Nature journal article supplement (doi:10.1007/s00125-012-2756-1), 2012-11-17
Supplement: MOESM23 [file 8091254]

**ESM Table 4 Summary of data production of exome sequencing of 2,000 DNA samples**

|                                               | Mean    | Standard deviation |
|-----------------------------------------------|---------|--------------------|
| Number of raw reads (million)                 | 22.3    | 3.9                |
| Raw data yield (Mb)                           | 1637.9  | 295.6              |
| Number of effective reads (million)           | 15.5    | 2.5                |
| Average read length* (bp)                     | 65.2    | 5.9                |
| Effective data yield (Mb)                     | 1015.2  | 198.9              |
| Effective reads mapped to exome** regions (%) | 45.5*** | 5.4                |
| Average depth for target regions              | 10.9    | 2.2                |
| Coverage of target region (%)                 | 95.5    | 1.3                |
| Rate of nucleotide mismatches (%)             | 1.04    | 0.23               |

Raw reads denote reads after removal of linker and adapter sequences. Effective reads are aligned reads after removal of linker and adapter sequence. \* The read length ranged from 30 bp to 80 bp. \*\*.

\*\*\* This is the percentage of reads that were mapped into or overlapped with target regions. It is not equal to the percentage of data that are mapped to the target regions.

The sequencing process was stopped if the real-time QC feedback gave negative information.

The standard deviations are derived from statistics of the 2,000 DNA samples.
