# Supplementary material for: Exome sequencing-driven discovery of coding polymorphisms associated with common metabolic phenotypes
Source: Springer Nature journal article supplement (doi:10.1007/s00125-012-2756-1), 2012-11-17
Supplement: MOESM24 [file 8091254]

**ESM Table 5 Non-redundant functional category annotations**

| Type          | 1000 Genomes | dbSNP | dbSNP & 1000 Genomes | Novel | All   |
|---------------|--------------|-------|----------------------|-------|-------|
| Nonsense      | 28           | 36    | 78                   | 101   | 243   |
| Nonsynonymous | 1130         | 3594  | 11061                | 4417  | 20202 |
| Splice site   | 52           | 25    | 31                   | 193   | 301   |
| UTR           | 230          | 390   | 1579                 | 557   | 2756  |
| Synonymous    | 805          | 3377  | 13968                | 2101  | 20251 |
| Near gene     | 24           | 26    | 135                  | 54    | 239   |
| Intron        | 3278         | 2626  | 13920                | 5968  | 25801 |
| Intergenic    | 46           | 59    | 187                  | 97    | 389   |
| Total         | 5602         | 10133 | 40959                | 13488 | 70182 |

Non-redundant meaning that a SNP can enter the table only once. Annotations were obtained using the SeattleSeq Annotation Build 5.0. The 1,000 genomes SNPs are from the April 2009 release and dbSNPs from build 129. Note that 37 SNPs could not be annotated because the number of coding bases was not a multiple of 3.
