# Supplementary material for: Exome sequencing-driven discovery of coding polymorphisms associated with common metabolic phenotypes
Source: Springer Nature journal article supplement (doi:10.1007/s00125-012-2756-1), 2012-11-17
Supplement: MOESM25 [file 8091254]

**ESM Table 6 Overview of replication efforts for 51 selected associations covered by 45 unique SNPs**

| Trait               | Gene            | SNP             | CHR | POS       | Vejle Biobank | French | METSIM | British | Dutch | Scandinavian | GLACIER | Total |
|---------------------|-----------------|-----------------|-----|-----------|---------------|--------|--------|---------|-------|--------------|---------|-------|
| Type 2 diabetes     | <i>COBLL1</i>   | rs7607980       | 2   | 165259447 | 2448          | 6750   | 4706   |         | 5324  | 12292        | 4887    | 36407 |
| Type 2 diabetes     | <i>MACF1</i>    | rs2296172       | 1   | 39608404  | 2462          | 6662   | 5790   | 26080   | 5350  | 12686        | 4866    | 63896 |
| Type 2 diabetes     | <i>GPSM1</i>    | rs60980157      | 9   | 138355236 | 2455          |        |        | 26080   | 5280  |              |         | 33815 |
| Type 2 diabetes     | <i>C9</i>       | rs34882957      | 5   | 39367651  | 2468          | 6768   | 4712   |         |       | 12718        | 4926    | 31592 |
| Type 2 diabetes     | <i>LMTK2</i>    | rs56204700      | 7   | 97659791  | 2449          | 6766   | 5816   |         |       | 12731        | 4927    | 32689 |
| Type 2 diabetes     | <i>GPNMB</i>    | chr7_23272666   | 7   | 23272666  | 2454          | 6800   | 5818   |         |       | 12725        | 4936    | 32733 |
| Type 2 diabetes     | <i>PHF15</i>    | chr5_133929838  | 5   | 133929838 | 2450          | 6801   | 4697   | 13663   |       | 12725        | 4935    | 45271 |
| Type 2 diabetes     | <i>C1orf222</i> | rs28633659      | 1   | 1844406   | 2459          | 6785   | 4704   | 26080   |       | 12254        | 4898    | 57180 |
| Type 2 diabetes     | <i>ELOVL3</i>   | rs36103207      | 10  | 103978255 | 2462          | 6841   | 5800   | 26080   |       | 12675        | 4931    | 58789 |
| Type 2 diabetes     | <i>KIR3DL3</i>  | rs16985907      | 19  | 59938624  | 2448          | 6807   | 5767   |         |       | 12342        | 4826    | 32190 |
| Type 2 diabetes     | <i>AQP8</i>     | chr16_25147310  | 16  | 25147310  | 2436          | 6772   | 4713   |         |       | 12741        | 4935    | 31597 |
| Type 2 diabetes     | <i>NISCH</i>    | rs9856575       | 3   | 52485632  | 2455          | 6768   | 5787   |         |       | 12739        | 4926    | 32675 |
| Obesity             | <i>ACP1</i>     | rs11553746      | 2   | 262203    | 1494          | 4600   | 4170   |         | 3065  | 7703         | 2712    | 23744 |
| Obesity             | <i>PML</i>      | rs743581        | 15  | 72115194  | 1503          | 4655   |        |         |       | 7751         | 2719    | 16628 |
| Obesity             | <i>MED20</i>    | chr6_41982766   | 6   | 41982766  | 1503          | 4682   | 3127   |         |       | 7763         | 2719    | 19794 |
| Obesity             | <i>C10orf47</i> | rs2147439       | 10  | 11951710  | 1507          |        | 4180   | 9049    |       | 7771         | 2680    | 25187 |
| Obesity             | <i>TCERG1L</i>  | chr10_132851444 | 10  | 132851444 | 1494          | 4665   | 4125   |         |       | 7758         | 2724    | 20766 |
| Obesity             | <i>GDAP1L1</i>  | rs2425632       | 20  | 42325348  | 1504          | 4693   | 4188   |         |       | 7776         | 2720    | 20881 |
| Obesity             | <i>OR2Y1</i>    | rs11960429      | 5   | 180099283 | 1512          | 4618   | 3397   |         |       | 7775         | 2725    | 20027 |
| Obesity             | <i>INHA</i>     | rs12720062      | 2   | 220148160 | 1512          | 4681   |        |         |       | 7741         | 2609    | 16543 |
| Obesity             | <i>TOMM40</i>   | rs157581        | 19  | 50087554  | 1498          | 4686   |        |         |       | 7727         | 2724    | 16635 |
| Obesity             | <i>SLC27A4</i>  | rs2240953       | 9   | 130150713 | 1512          | 4621   | 3397   | 9049    |       |              | 2676    | 21255 |
| Obesity             | <i>ANKH</i>     | chr5_14924560   | 5   | 14924560  | 1496          |        | 4185   | 3906    |       | 7735         | 2634    | 19956 |
| BMI                 | <i>ACP1</i>     | rs11553746      | 2   | 262203    | 2514          | 6569   | 8108   |         | 5304  | 12534        | 4902    | 39931 |
| BMI                 | <i>TGIF1</i>    | rs4468717       | 18  | 3447606   | 2526          | 6691   |        |         |       |              |         | 9217  |
| BMI                 | <i>SIM2</i>     | chr21_37003350  | 21  | 37003350  | 2537          |        | 8131   |         |       | 12527        |         | 23195 |
| BMI                 | <i>CCDC165</i>  | rs35739383      | 18  | 8773835   | 2539          | 6616   |        |         |       | 12441        |         | 21596 |
| BMI                 | <i>SLC27A4</i>  | rs2240953       | 9   | 130150713 | 2547          | 6599   | 6635   | 15995   |       |              | 4834    | 36610 |
| Waist circumference | <i>ACP1</i>     | rs11553746      | 2   | 262203    | 2528          | 5705   | 8121   |         | 5103  | 6331         | 1256    | 29044 |
| Waist circumference | <i>OR10Z1</i>   | rs41273513      | 1   | 156843597 | 2548          | 5814   | 8149   |         |       | 6360         | 1263    | 24134 |

| Trait                              | Gene            | SNP             | CHR | POS       | Veje<br>Biobank | French | METSIM | British | Dutch | Scandina<br>vian | GLACIER | Total |
|------------------------------------|-----------------|-----------------|-----|-----------|-----------------|--------|--------|---------|-------|------------------|---------|-------|
| Waist circumference                | <i>ELOVL3</i>   | rs36103207      | 10  | 103978255 | 2555            | 5858   | 8127   | 13019   |       | 6372             | 1255    | 37186 |
| Waist circumference                | <i>SLC27A4</i>  | rs2240953       | 9   | 130150713 | 2560            | 5732   | 6644   | 13019   |       |                  | 1247    | 29202 |
| Fasting plasma glucose             | <i>ZFAND2B</i>  | rs61750009      | 2   | 219780675 | 1248            | 5254   | 7001   |         | 2279  | 6436             | 3342    | 25560 |
| Fasting plasma glucose             | <i>CSAD</i>     | chr12_51840193  | 12  | 51840193  | 1260            | 5287   | 5731   |         | 2289  | 6395             | 3308    | 24270 |
| Fasting plasma glucose             | <i>PTPRH</i>    | rs16986309      | 19  | 60401886  | 1257            | 5201   | 7019   |         |       | 6417             | 3337    | 23231 |
| Fasting plasma glucose             | <i>ELOVL3</i>   | rs36103207      | 10  | 103978255 | 1257            | 5269   | 6999   |         |       | 6379             | 3350    | 23254 |
| Fasting plasma glucose             | <i>EIF2B4</i>   | rs1058065       | 2   | 27441228  | 1253            | 5233   | 5689   |         |       | 6435             | 3340    | 21950 |
| Fasting plasma glucose             | <i>ABCC2</i>    | rs41318029      | 10  | 101580476 | 1252            | 5268   | 7024   |         |       | 6434             | 3341    | 23319 |
| Fasting plasma glucose             | <i>BRD3</i>     | rs34609592      | 9   | 135905516 | 1259            | 5269   | 5727   |         |       | 6442             | 3352    | 22049 |
| Fasting plasma glucose             | <i>CASP4</i>    | rs1801319       | 11  | 104330859 | 1242            |        | 7023   |         |       | 6427             | 3342    | 18034 |
| Fasting serum insulin              | <i>GRK4</i>     | rs35605687      | 4   | 2985351   |                 | 5214   | 5711   |         |       | 6331             |         | 17256 |
| Fasting serum insulin              | <i>DST</i>      | chr6_56588459   | 6   | 56588459  |                 | 5202   | 7018   |         |       |                  |         | 12220 |
| Fasting serum insulin              | <i>ENTPD5</i>   | rs12434581      | 14  | 73524572  |                 | 5135   |        |         |       |                  |         | 5135  |
| Fasting serum insulin              | <i>PHC2</i>     | rs41265897      | 1   | 33608751  |                 | 5232   | 6998   |         |       | 6247             |         | 18477 |
| Fasting serum insulin              | <i>FBN3</i>     | chr19_8082890   | 19  | 8082890   |                 | 5111   | 7015   |         |       | 6284             |         | 18410 |
| Fasting serum insulin              | <i>C13orf35</i> | chr13_112385690 | 13  | 112385690 |                 | 5203   | 7004   |         |       | 6349             |         | 18556 |
| Fasting serum insulin              | <i>DHX58</i>    | rs35118457      | 17  | 37516926  |                 | 5166   | 5706   |         |       | 6323             |         | 17195 |
| Fasting serum insulin              | <i>AKAP12</i>   | rs41289373      | 6   | 151714763 |                 | 5179   | 7017   |         |       | 6351             |         | 18547 |
| Fasting plasma HDL-<br>cholesterol | <i>CD300LG</i>  | chr17_39281652  | 17  | 39281652  | 1057            | 5006   | 5291   |         | 2095  | 6155             | 1218    | 20822 |
| Fasting plasma HDL-<br>cholesterol | <i>SLC26A2</i>  | chr5_149340823  | 5   | 149340823 | 1057            | 5018   | 5331   |         |       | 6184             | 1214    | 18804 |
| Fasting plasma<br>triacylglycerol  | <i>PRRC2A</i>   | rs41273264      | 6   | 31708085  | 1058            | 5048   | 5208   |         | 2103  |                  | 2718    | 16135 |

Data are number of genotyped individuals in each replication study sample and in total for each of 51 associations. More information on the replication cohorts is given in ESM Methods section 1.3. SNP information is based on dbSNP 129 and genome build 36. The very variable numbers of samples for each study sample and SNP is due to 1) not all SNPs were genotyped in all cohorts and 2) not all cohorts have information on all traits.
