# Supplementary material for: Exome sequencing-driven discovery of coding polymorphisms associated with common metabolic phenotypes
Source: Springer Nature journal article supplement (doi:10.1007/s00125-012-2756-1), 2012-11-17
Supplement: MOESM26 [file 8091254]

**ESM Table 7 51 associations for eight metabolic traits selected for replication in stage 3**

| Trait               | Gene            | rs-number  | Chr-Pos      | Effect allele | Non effect allele | MAF  | MAF-HapMap | Function | Mutation | <i>n</i> | Effect (95% CI)     | <i>P</i> -value      |
|---------------------|-----------------|------------|--------------|---------------|-------------------|------|------------|----------|----------|----------|---------------------|----------------------|
| Type 2 diabetes     | <i>COBLL1</i>   | rs7607980  | 2-165259447  | C             | T                 | 13   | 16         | Nonsyn   | N939D    | 12177    | 0.80 (0.74 to 0.87) | 3×10 <sup>-7</sup>   |
| Type 2 diabetes     | <i>KIR3DL3</i>  | rs16985907 | 19-59938624  | C             | G                 | 4.1  | 4.2        | Nonsyn   | A348P    | 12179    | 1.31 (1.16 to 1.49) | 7.5×10 <sup>-5</sup> |
| Type 2 diabetes     | <i>C1orf222</i> | rs28633659 | 1-1844406    | T             | C                 | 3.9  |            | Nonsyn   | E187K    | 12179    | 0.76 (0.66 to 0.87) | 2×10 <sup>-4</sup>   |
| Type 2 diabetes     | <i>GPSM1</i>    | rs60980157 | 9-138355236  | T             | C                 | 25   |            | Nonsyn   | S368L    | 12175    | 0.89 (0.84 to 0.94) | 0.00028              |
| Type 2 diabetes     | <i>AQP8</i>     |            | 16-25147310  | A             | G                 | 2.4  |            | Nonsyn   | R261Q    | 12175    | 0.71 (0.59 to 0.85) | 0.00038              |
| Type 2 diabetes     | <i>C9</i>       | rs34882957 | 5-39367651   | A             | G                 | 0.97 |            | Nonsyn   | P167S    | 12177    | 0.58 (0.44 to 0.77) | 0.00043              |
| Type 2 diabetes     | <i>NISCH</i>    | rs9856575  | 3-52485632   | G             | A                 | 2.1  | 0.4        | Nonsyn   | I299V    | 12177    | 1.40 (1.17 to 1.68) | 0.00055              |
| Type 2 diabetes     | <i>GPNMB</i>    |            | 7-23272666   | A             | G                 | 2.2  |            | Nonsyn   | A354T    | 12179    | 1.39 (1.16 to 1.65) | 0.00055              |
| Type 2 diabetes     | <i>MACF1</i>    | rs2296172  | 1-39608404   | G             | A                 | 23   | 18         | Nonsyn   | M2290V   | 12175    | 1.12 (1.05 to 1.19) | 0.00065              |
| Type 2 diabetes     | <i>LMTK2</i>    | rs56204700 | 7-97659791   | C             | T                 | 2.2  |            | Nonsyn   | I693T    | 12179    | 1.38 (1.16 to 1.65) | 0.00076              |
| Type 2 diabetes     | <i>ELOVL3</i>   | rs36103207 | 10-103978255 | A             | G                 | 3.7  |            | Nonsyn   | D109N    | 12178    | 1.28 (1.12 to 1.47) | 0.00083              |
| Type 2 diabetes     | <i>PHF15</i>    |            | 5-133929838  | T             | G                 | 1.4  |            | Nonsyn   | G368V    | 12151    | 0.66 (0.52 to 0.83) | 0.00089              |
| Obesity             | <i>ACP1</i>     | rs11553746 | 2-262203     | T             | C                 | 38   | 30         | Nonsyn   | T95I     | 10324    | 0.89 (0.84 to 0.94) | 9.4×10 <sup>-5</sup> |
| Obesity             | <i>TCERG1L</i>  |            | 10-132851444 | T             | C                 | 3.7  |            | Nonsyn   | G322E    | 10346    | 1.37 (1.18 to 1.59) | 0.00013              |
| Obesity             | <i>INHA</i>     | rs12720062 | 2-220148160  | A             | G                 | 2.1  |            | Nonsyn   | A257T    | 10306    | 0.68 (0.56 to 0.83) | 0.00038              |
| Obesity             | <i>GDAP1L1</i>  | rs2425632  | 20-42325348  | T             | C                 | 4.2  |            | Syn      |          | 10346    | 0.78 (0.68 to 0.89) | 0.00049              |
| Obesity             | <i>C10orf47</i> | rs2147439  | 10-11951710  | A             | G                 | 1.5  |            | Nonsyn   | E203K    | 10346    | 1.53 (1.22 to 1.93) | 0.00057              |
| Obesity             | <i>ANKH</i>     |            | 5-14924560   | T             | C                 | 7.7  |            | 5'UTR    |          | 10346    | 0.83 (0.75 to 0.92) | 0.00073              |
| Obesity             | <i>SLC27A4</i>  | rs2240953  | 9-130150713  | A             | G                 | 4.2  |            | Nonsyn   | G209S    | 10308    | 1.29 (1.12 to 1.48) | 0.00073              |
| Obesity             | <i>TOMM40</i>   | rs157581   | 19-50087554  | C             | T                 | 24   |            | Syn      |          | 10344    | 0.89 (0.83 to 0.95) | 0.00076              |
| Obesity             | <i>PML</i>      | rs743581   | 15-72115194  | T             | G                 | 37   |            | Nonsyn   | G780V    | 10346    | 1.11 (1.05 to 1.17) | 0.00079              |
| Obesity             | <i>MED20</i>    |            | 6-41982766   | A             | C                 | 1.6  |            | 3'UTR    |          | 10345    | 0.67 (0.54 to 0.84) | 0.00085              |
| Obesity             | <i>OR2Y1</i>    | rs11960429 | 5-180099283  | A             | G                 | 1.2  | 2.1        | Nonsyn   | R128C    | 10346    | 0.64 (0.5 to 0.82)  | 0.00098              |
| BMI                 | <i>ACP1</i>     | rs11553746 | 2-262203     | T             | C                 | 38   | 30         | Nonsyn   | T95I     | 14793    | -0.06 (0.01)        | 1.1×10 <sup>-5</sup> |
| BMI                 | <i>SLC27A4</i>  | rs2240953  | 9-130150713  | A             | G                 | 4.2  |            | Nonsyn   | G209S    | 14776    | 0.12 (0.03)         | 0.00017              |
| BMI                 | <i>CCDC165</i>  | rs35739383 | 18-8773835   | T             | C                 | 40   |            | Nonsyn   | M242T    | 14820    | -0.04 (0.01)        | 0.00051              |
| BMI                 | <i>TGIF1</i>    | rs4468717  | 18-3447606   | T             | C                 | 7.2  |            | Nonsyn   | P163S    | 14759    | 0.08 (0.02)         | 0.00064              |
| BMI                 | <i>SIM2</i>     |            | 21-37003350  | T             | C                 | 5.1  |            | Nonsyn   | A63V     | 14827    | -0.09 (0.03)        | 0.00076              |
| Waist circumference | <i>SLC27A4</i>  | rs2240953  | 9-130150713  | A             | G                 | 4.2  |            | Nonsyn   | G209S    | 14496    | 0.12 (0.03)         | 4.1×10 <sup>-5</sup> |

| Trait                         | Gene            | rs-number  | Chr-Pos      | Effect allele | Non effect allele | MAF | MAF-HapMap | Function | Mutation | <i>n</i> | Effect (95% CI) | <i>P</i> -value      |
|-------------------------------|-----------------|------------|--------------|---------------|-------------------|-----|------------|----------|----------|----------|-----------------|----------------------|
| Waist circumference           | <i>ACP1</i>     | rs11553746 | 2-262203     | T             | C                 | 38  | 30         | Nonsyn   | T95I     | 14513    | -0.05 (0.01)    | 0.00011              |
| Waist circumference           | <i>OR10Z1</i>   | rs41273513 | 1-156843597  | G             | A                 | 1.5 |            | Nonsyn   | I249V    | 14544    | -0.17 (0.05)    | 0.00045              |
| Waist circumference           | <i>ELOVL3</i>   | rs36103207 | 10-103978255 | A             | G                 | 3.7 |            | Nonsyn   | D109N    | 14545    | 0.10 (0.03)     | 0.00083              |
| Fasting plasma glucose        | <i>CASP4</i>    | rs1801319  | 11-104330859 | T             | C                 | 4.3 |            | 5'UTR    |          | 9087     | 0.13 (0.03)     | 0.00019              |
| Fasting plasma glucose        | <i>EIF2B4</i>   | rs1058065  | 2-27441228   | A             | G                 | 2.1 | 4.2        | Syn      |          | 9087     | 0.18 (0.05)     | 3×10 <sup>-4</sup>   |
| Fasting plasma glucose        | <i>ELOVL3</i>   | rs36103207 | 10-103978255 | A             | G                 | 3.7 |            | Nonsyn   | D109N    | 9086     | 0.13 (0.04)     | 0.00055              |
| Fasting plasma glucose        | <i>BRD3</i>     | rs34609592 | 9-135905516  | A             | G                 | 1.7 |            | Nonsyn   | A172V    | 9087     | 0.19 (0.05)     | 0.00056              |
| Fasting plasma glucose        | <i>CSAD</i>     |            | 12-51840193  | T             | C                 | 1   |            | Nonsyn   | D382N    | 9087     | -0.24 (0.07)    | 0.00056              |
| Fasting plasma glucose        | <i>ZFAND2B</i>  | rs61750009 | 2-219780675  | A             | C                 | 4.2 |            | Nonsyn   | P71H     | 9080     | -0.12 (0.03)    | 0.00065              |
| Fasting plasma glucose        | <i>ABCC2</i>    | rs41318029 | 10-101580476 | A             | G                 | 1.6 |            | Nonsyn   | G921S    | 9087     | 0.19 (0.06)     | 0.00085              |
| Fasting plasma glucose        | <i>PTPRH</i>    | rs16986309 | 19-60401886  | A             | G                 | 11  | 17         | Nonsyn   | L543F    | 9087     | -0.08 (0.02)    | 0.00087              |
| Fasting serum insulin         | <i>GRK4</i>     | rs35605687 | 4-2985351    | A             | G                 | 15  | 16         | Nonsyn   | V215I    | 8417     | -0.10 (0.02)    | 1.1×10 <sup>-5</sup> |
| Fasting serum insulin         | <i>DST</i>      |            | 6-56588459   | C             | T                 | 3.6 |            | Nonsyn   | I2589V   | 8418     | -0.18 (0.04)    | 1.7×10 <sup>-5</sup> |
| Fasting serum insulin         | <i>ENTPD5</i>   | rs12434581 | 14-73524572  | A             | T                 | 41  |            | 5'UTR    |          | 8413     | -0.06 (0.02)    | 5.2×10 <sup>-5</sup> |
| Fasting serum insulin         | <i>AKAP12</i>   | rs41289373 | 6-151714763  | A             | G                 | 1.3 |            | Nonsyn   | A1182T   | 8381     | -0.25 (0.06)    | 9×10 <sup>-5</sup>   |
| Fasting serum insulin         | <i>C13orf35</i> |            | 13-112385690 | T             | C                 | 1.7 |            | Nonsyn   | R121W    | 8419     | -0.21 (0.06)    | 0.00042              |
| Fasting serum insulin         | <i>PHC2</i>     | rs41265897 | 1-33608751   | A             | G                 | 4   |            | Nonsyn   | A145V    | 8417     | -0.14 (0.04)    | 0.00042              |
| Fasting serum insulin         | <i>DHX58</i>    | rs35118457 | 17-37516926  | T             | C                 | 5.8 |            | Nonsyn   | R95Q     | 8418     | 0.11 (0.03)     | 9×10 <sup>-4</sup>   |
| Fasting serum insulin         | <i>FBN3</i>     |            | 19-8082890   | G             | C                 | 2.6 |            | Nonsyn   | G1311A   | 8418     | -0.16 (0.05)    | 0.001                |
| Fasting serum HDL-cholesterol | <i>CD300LG</i>  |            | 17-39281652  | T             | C                 | 3.5 |            | Nonsyn   | R82C     | 13063    | -0.18 (0.03)    | 7.1×10 <sup>-8</sup> |
| Fasting serum HDL-cholesterol | <i>SLC26A2</i>  |            | 5-149340823  | T             | C                 | 2.1 |            | Nonsyn   | R492W    | 13060    | -0.18 (0.04)    | 1.5×10 <sup>-5</sup> |
| Fasting serum triacylglycerol | <i>PRRC2A</i>   | rs41273264 | 6-31708085   | A             | C                 | 4.2 |            | Nonsyn   | S1219Y   | 13326    | 0.13 (0.03)     | 5.2×10 <sup>-5</sup> |

51 associations with metabolic phenotypes for 45 unique SNPs selected for replication in stage 3. More details on the selection process are given in ESM Methods section 4.1. Rs numbers are based on dbSNP 129. Chromosome and position based on genome build 36. All alleles are shown on the positive strand. HapMap allele frequencies are based on the HapMap CEU population release 27. All effects are shown for the minor allele. *P*-values have been corrected by genomic control.
