# Supplementary material for: Exome sequencing-driven discovery of coding polymorphisms associated with common metabolic phenotypes
Source: Springer Nature journal article supplement (doi:10.1007/s00125-012-2756-1), 2012-11-17
Supplement: MOESM27 [file 8091254]

**ESM Table 8 Association between 45 SNPs selected for replication and all 12 traits in Danish stage 2 data**

| SNP             | Main association | Type 2 diabetes | Obesity                     | Hypertension   | BMI                           | Waist circumference         | Fasting plasma glucose | Fasting serum insulin         | Fasting total cholesterol | Fasting serum HDL-cholesterol | Fasting serum triacylglycerol | Systolic BP    | Diastolic BP   |
|-----------------|------------------|-----------------|-----------------------------|----------------|-------------------------------|-----------------------------|------------------------|-------------------------------|---------------------------|-------------------------------|-------------------------------|----------------|----------------|
| N               |                  | 12179           | 10346                       | 10590          | 14828                         | 14547                       | 9087                   | 8419                          | 13183                     | 13063                         | 13326                         | 12651          | 12650          |
|                 |                  | OR / p          | OR / p                      | OR / p         | β / p                         | β / p                       | β / p                  | β / p                         | β / p                     | β / p                         | β / p                         | β / p          | β / p          |
| rs4468717       | BMI              | 1 / 0.53        | 1.2 / 0.0036                | 1.1 / 0.38     | 0.077 / 0.00064               | 0.06 / 0.0051               | 0.019 / 0.47           | 0.011 / 0.7                   | -0.0078 / 0.74            | -0.08 / 3×10 <sup>-4</sup>    | 0.069 / 0.0031                | 0.0074 / 0.75  | 0.019 / 0.39   |
| rs35739383      | BMI              | 0.96 / 0.17     | 0.93 / 0.012                | 0.99 / 0.83    | -0.044 / 5×10 <sup>-4</sup>   | -0.038 / 0.0016             | 0.023 / 0.12           | 0.0048 / 0.76                 | -0.0074 / 0.57            | 0.025 / 0.043                 | -0.035 / 0.0074               | -0.0035 / 0.78 | -0.011 / 0.4   |
| chr21_37003350  | BMI              | 0.91 / 0.14     | 0.85 / 0.02                 | 1.1 / 0.43     | -0.095 / 0.00076              | -0.076 / 0.0044             | -0.023 / 0.48          | -0.047 / 0.17                 | 0.00058 / 0.98            | 0.048 / 0.079                 | -0.07 / 0.016                 | -0.0011 / 0.97 | 0.015 / 0.58   |
| rs2147439       | Obesity          | 1.1 / 0.3       | 1.5 / 0.00057               | 1.3 / 0.046    | 0.099 / 0.052                 | 0.095 / 0.05                | 0.024 / 0.69           | 0.12 / 0.062                  | 0.043 / 0.41              | -0.061 / 0.22                 | 0.04 / 0.44                   | 0.098 / 0.059  | 0.095 / 0.061  |
| chr10_132851444 | Obesity          | 1.2 / 0.0084    | 1.4 / 0.00013               | 1.1 / 0.28     | 0.083 / 0.013                 | 0.049 / 0.12                | 0.009 / 0.82           | 0.025 / 0.57                  | 0.042 / 0.22              | 0.017 / 0.59                  | 0.016 / 0.64                  | 0.072 / 0.032  | 0.04 / 0.22    |
| rs743581        | Obesity          | 1.1 / 0.022     | 1.1 / 0.00079               | 1.1 / 0.022    | 0.028 / 0.027                 | 0.02 / 0.097                | 0.0032 / 0.83          | -0.0044 / 0.79                | 0.0057 / 0.67             | -0.012 / 0.34                 | 0.033 / 0.012                 | 0.029 / 0.025  | 0.016 / 0.21   |
| rs157581        | Obesity          | 0.91 / 0.0046   | 0.89 / 0.00076              | 0.97 / 0.39    | -0.039 / 0.0067               | -0.037 / 0.0071             | -0.0088 / 0.6          | -0.037 / 0.039                | 0.052 / 0.00052           | -0.029 / 0.04                 | 0.075 / 3.5×10 <sup>-7</sup>  | -0.0056 / 0.7  | -0.011 / 0.44  |
| rs12720062      | Obesity          | 0.72 / 0.0015   | 0.68 / 0.00038              | 0.84 / 0.094   | -0.13 / 0.0039                | -0.13 / 0.0013              | 0.045 / 0.35           | -0.0022 / 0.97                | -0.0093 / 0.84            | 0.021 / 0.62                  | -0.07 / 0.12                  | -0.043 / 0.33  | -0.034 / 0.43  |
| rs2425632       | Obesity          | 0.91 / 0.15     | 0.78 / 0.00049              | 0.94 / 0.43    | -0.096 / 0.0017               | -0.069 / 0.017              | -0.098 / 0.005         | -0.094 / 0.013                | -0.031 / 0.33             | 0.087 / 0.0037                | -0.1 / 0.0013                 | -0.027 / 0.39  | -0.052 / 0.089 |
| chr5_14924560   | Obesity          | 0.92 / 0.13     | 0.83 / 0.00073              | 0.95 / 0.38    | -0.069 / 0.0026               | -0.034 / 0.12               | -0.023 / 0.38          | -0.019 / 0.51                 | -0.016 / 0.51             | 0.017 / 0.46                  | -0.028 / 0.23                 | -0.0079 / 0.74 | -0.013 / 0.57  |
| rs11960429      | Obesity          | 0.81 / 0.11     | 0.64 / 0.00098              | 0.87 / 0.33    | -0.18 / 0.0014                | -0.15 / 0.0062              | 0.027 / 0.66           | -0.08 / 0.24                  | 0.034 / 0.57              | 0.067 / 0.24                  | -0.037 / 0.53                 | -0.05 / 0.4    | -0.03 / 0.6    |
| chr6_41982766   | Obesity          | 0.92 / 0.43     | 0.67 / 0.00085              | 0.86 / 0.2     | -0.13 / 0.0062                | -0.087 / 0.065              | -0.013 / 0.82          | -0.06 / 0.33                  | 0.018 / 0.73              | 0.024 / 0.61                  | -0.023 / 0.65                 | -0.012 / 0.82  | -0.0081 / 0.87 |
| rs11553746      | Obesity, BMI, WC | 0.92 / 0.0056   | 0.89 / 9.4×10 <sup>-5</sup> | 0.93 / 0.031   | -0.056 / 1.1×10 <sup>-5</sup> | -0.047 / 0.00011            | 0.0012 / 0.93          | 0.015 / 0.36                  | -0.0027 / 0.84            | 0.026 / 0.034                 | -0.044 / 0.00076              | -0.031 / 0.018 | -0.024 / 0.057 |
| rs2240953       | Obesity, BMI, WC | 1.2 / 0.047     | 1.3 / 0.00073               | 1.1 / 0.12     | 0.12 / 0.00017                | 0.12 / 4.1×10 <sup>-5</sup> | 0.042 / 0.25           | 0.041 / 0.31                  | 0.018 / 0.57              | -0.0011 / 0.97                | 0.024 / 0.45                  | 0.047 / 0.14   | 0.034 / 0.27   |
| chr17_39281652  | HDL              | 1.1 / 0.24      | 1.1 / 0.38                  | 0.99 / 0.95    | 0.032 / 0.34                  | 0.038 / 0.23                | 0.028 / 0.48           | 0.041 / 0.33                  | -0.034 / 0.34             | -0.18 / 7.2×10 <sup>-8</sup>  | 0.12 / 0.00066                | 0.00013 / 1    | 0.0089 / 0.79  |
| chr5_149340823  | HDL              | 0.96 / 0.64     | 1 / 0.66                    | 1 / 0.69       | 0.015 / 0.72                  | 0.015 / 0.71                | 0.037 / 0.45           | 0.013 / 0.8                   | -0.012 / 0.79             | -0.18 / 1.5×10 <sup>-5</sup>  | 0.12 / 0.0073                 | 0.035 / 0.43   | -0.008 / 0.85  |
| rs41265897      | FINS             | 0.88 / 0.079    | 0.81 / 0.0047               | 0.78 / 0.00094 | -0.078 / 0.013                | -0.08 / 0.0074              | -0.058 / 0.1           | -0.14 / 0.00042               | -0.08 / 0.015             | -0.0039 / 0.9                 | -0.081 / 0.012                | -0.09 / 0.0056 | -0.09 / 0.0043 |
| chr13_112385690 | FINS             | 0.88 / 0.24     | 0.95 / 0.63                 | 1 / 0.84       | -0.057 / 0.24                 | -0.073 / 0.1                | -0.1 / 0.06            | -0.21 / 0.00042               | 0.034 / 0.49              | 0.074 / 0.12                  | -0.08 / 0.11                  | 0.0057 / 0.91  | -0.0089 / 0.85 |
| rs12434581      | FINS             | 1 / 0.99        | 1 / 0.67                    | 1 / 0.51       | -0.0025 / 0.84                | -0.001 / 0.93               | -0.0024 / 0.87         | -0.064 / 5.3×10 <sup>-5</sup> | -0.0057 / 0.66            | 0.0092 / 0.46                 | 0.005 / 0.7                   | 0.0052 / 0.69  | 0.0041 / 0.74  |
| rs35118457      | FINS             | 1 / 0.59        | 1 / 0.85                    | 1 / 0.94       | 0.028 / 0.29                  | 0.028 / 0.27                | -0.0015 / 0.96         | 0.11 / 9×10 <sup>-4</sup>     | 0.0025 / 0.93             | -0.052 / 0.047                | 0.044 / 0.11                  | -0.00016 / 1   | -0.017 / 0.53  |
| chr19_8082890   | FINS             | 0.9 / 0.25      | 0.82 / 0.035                | 0.94 / 0.49    | -0.11 / 0.0058                | -0.099 / 0.0078             | -0.03 / 0.51           | -0.16 / 0.001                 | -0.0077 / 0.85            | 0.1 / 0.0083                  | -0.12 / 0.0043                | -0.0082 / 0.84 | -0.019 / 0.62  |

| SNP            | Main association | Type 2 diabetes            | Obesity       | Hypertension | BMI            | Waist circumference | Fasting plasma glucose    | Fasting serum insulin         | Fasting total cholesterol | Fasting serum HDL-cholesterol | Fasting serum triacylglycerol | Systolic BP    | Diastolic BP  |
|----------------|------------------|----------------------------|---------------|--------------|----------------|---------------------|---------------------------|-------------------------------|---------------------------|-------------------------------|-------------------------------|----------------|---------------|
| rs35605687     | FINS             | 0.99 / 0.83                | 0.93 / 0.064  | 0.94 / 0.19  | -0.041 / 0.02  | -0.04 / 0.017       | -0.014 / 0.5              | -0.096 / 1.1×10 <sup>-5</sup> | -0.02 / 0.28              | 0.011 / 0.53                  | -0.045 / 0.012                | -0.0058 / 0.74 | -0.015 / 0.38 |
| rs41289373     | FINS             | 0.86 / 0.21                | 0.93 / 0.52   | 1 / 0.75     | -0.067 / 0.19  | -0.11 / 0.027       | -0.072 / 0.23             | -0.25 / 9×10 <sup>-5</sup>    | 0.074 / 0.16              | 0.075 / 0.13                  | -0.019 / 0.72                 | 0.038 / 0.46   | 0.062 / 0.22  |
| chr6_56588459  | FINS             | 0.91 / 0.2                 | 0.93 / 0.37   | 0.96 / 0.64  | -0.03 / 0.37   | -0.018 / 0.56       | -0.017 / 0.66             | -0.18 / 1.7×10 <sup>-5</sup>  | -0.025 / 0.47             | 0.0092 / 0.78                 | -0.046 / 0.18                 | 0.0067 / 0.84  | -0.013 / 0.69 |
| rs41318029     | FGLU             | 1.1 / 0.5                  | 1.1 / 0.25    | 1 / 0.73     | 0.065 / 0.19   | 0.068 / 0.14        | 0.19 / 0.00086            | 0.092 / 0.14                  | -0.087 / 0.082            | 0.01 / 0.83                   | 0.015 / 0.77                  | 0.024 / 0.62   | -0.024 / 0.61 |
| rs1801319      | FGLU             | 1 / 0.72                   | 1 / 0.62      | 0.93 / 0.32  | 0.037 / 0.22   | 0.0038 / 0.9        | 0.13 / 0.00019            | 0.059 / 0.11                  | 0.016 / 0.61              | 0.0034 / 0.91                 | 0.035 / 0.26                  | -0.014 / 0.66  | 0.014 / 0.63  |
| chr12_51840193 | FGLU             | 0.99 / 0.94                | 0.67 / 0.0077 | 0.75 / 0.06  | -0.15 / 0.013  | -0.12 / 0.041       | -0.24 / 0.00057           | -0.052 / 0.49                 | -0.089 / 0.17             | -0.019 / 0.76                 | -0.031 / 0.63                 | -0.074 / 0.23  | -0.13 / 0.039 |
| rs16986309     | FGLU             | 0.98 / 0.66                | 0.96 / 0.45   | 0.96 / 0.45  | -0.031 / 0.12  | -0.03 / 0.12        | -0.077 / 0.00087          | -0.027 / 0.29                 | -0.047 / 0.023            | -0.013 / 0.51                 | -0.041 / 0.047                | -0.0064 / 0.75 | -0.014 / 0.47 |
| rs61750009     | FGLU             | 0.91 / 0.2                 | 0.99 / 0.91   | 0.92 / 0.28  | 0.0085 / 0.78  | -0.0055 / 0.85      | -0.12 / 0.00065           | -0.024 / 0.53                 | -0.046 / 0.15             | -0.054 / 0.071                | 0.02 / 0.53                   | -0.035 / 0.26  | -0.04 / 0.19  |
| rs1058065      | FGLU             | 1.3 / 0.018                | 0.96 / 0.69   | 1.2 / 0.066  | -0.0039 / 0.93 | -0.0041 / 0.92      | 0.18 / 3×10 <sup>-4</sup> | 0.025 / 0.64                  | 0.028 / 0.53              | -0.11 / 0.012                 | 0.073 / 0.1                   | 0.042 / 0.34   | 0.11 / 0.01   |
| rs34609592     | FGLU             | 1 / 0.75                   | 1.1 / 0.31    | 1 / 0.71     | -0.02 / 0.68   | -0.0067 / 0.88      | 0.19 / 0.00056            | 0.16 / 0.0086                 | -0.081 / 0.099            | 0.04 / 0.4                    | -0.07 / 0.15                  | 0.004 / 0.93   | -0.035 / 0.47 |
| rs28633659     | T2D              | 0.76 / 2×10 <sup>-4</sup>  | 0.84 / 0.024  | 0.88 / 0.11  | -0.06 / 0.057  | -0.067 / 0.025      | -0.06 / 0.093             | -0.1 / 0.007                  | 0.0063 / 0.85             | 0.02 / 0.51                   | -0.03 / 0.35                  | -0.05 / 0.12   | -0.046 / 0.14 |
| rs2296172      | T2D              | 1.1 / 0.00065              | 1.1 / 0.011   | 1.1 / 0.14   | 0.035 / 0.016  | 0.037 / 0.0074      | 0.042 / 0.012             | 0.021 / 0.25                  | -0.025 / 0.096            | -0.049 / 0.00061              | 0.018 / 0.24                  | 0.013 / 0.39   | 0.019 / 0.18  |
| chr16_25147310 | T2D              | 0.71 / 0.00038             | 0.8 / 0.026   | 0.94 / 0.51  | -0.098 / 0.016 | -0.1 / 0.0093       | -0.024 / 0.6              | -0.015 / 0.75                 | -0.071 / 0.09             | 0.052 / 0.19                  | -0.094 / 0.023                | -0.045 / 0.27  | -0.047 / 0.23 |
| rs16985907     | T2D              | 1.3 / 7.5×10 <sup>-5</sup> | 1.2 / 0.008   | 1.3 / 0.0034 | 0.074 / 0.017  | 0.085 / 0.0042      | 0.014 / 0.72              | 0.043 / 0.28                  | 0.041 / 0.2               | -0.051 / 0.1                  | 0.09 / 0.0055                 | 0.083 / 0.0098 | 0.037 / 0.24  |
| rs7607980      | T2D              | 0.8 / 3×10 <sup>-7</sup>   | 0.92 / 0.076  | 0.91 / 0.052 | -0.019 / 0.3   | -0.025 / 0.16       | 0.03 / 0.15               | -0.022 / 0.33                 | -0.00071 / 0.97           | 0.072 / 6.8×10 <sup>-5</sup>  | -0.05 / 0.0091                | -0.026 / 0.17  | 0.0031 / 0.87 |
| rs9856575      | T2D              | 1.4 / 0.00055              | 1.2 / 0.17    | 1.3 / 0.043  | 0.09 / 0.04    | 0.07 / 0.093        | 0.062 / 0.25              | -0.094 / 0.1                  | 0.054 / 0.23              | 0.077 / 0.072                 | -0.01 / 0.82                  | 0.11 / 0.013   | 0.071 / 0.1   |
| chr5_133929838 | T2D              | 0.66 / 0.00089             | 0.81 / 0.1    | 0.86 / 0.25  | -0.11 / 0.031  | -0.12 / 0.017       | -0.1 / 0.064              | -0.033 / 0.59                 | -0.00088 / 0.99           | 0.018 / 0.73                  | -0.062 / 0.25                 | -0.03 / 0.57   | 0.0098 / 0.85 |
| rs34882957     | T2D              | 0.58 / 0.00043             | 0.68 / 0.011  | 0.65 / 0.005 | -0.18 / 0.0037 | -0.15 / 0.012       | -0.084 / 0.2              | 0.021 / 0.77                  | 0.042 / 0.51              | 0.038 / 0.54                  | -0.06 / 0.34                  | -0.1 / 0.1     | -0.082 / 0.18 |
| chr7_23272666  | T2D              | 1.4 / 0.00055              | 1.1 / 0.17    | 1.3 / 0.02   | 0.049 / 0.25   | 0.034 / 0.41        | 0.046 / 0.37              | 0.026 / 0.64                  | -0.012 / 0.79             | -0.034 / 0.41                 | 0.054 / 0.22                  | 0.13 / 0.0025  | 0.097 / 0.021 |
| rs56204700     | T2D              | 1.4 / 0.00076              | 1.1 / 0.29    | 1.2 / 0.17   | 0.056 / 0.19   | 0.03 / 0.46         | 0.031 / 0.55              | 0.018 / 0.74                  | 0.081 / 0.069             | -0.028 / 0.51                 | 0.063 / 0.16                  | 0.069 / 0.11   | 0.048 / 0.25  |
| rs60980157     | T2D              | 0.89 / 0.00028             | 0.93 / 0.043  | 1 / 0.7      | -0.017 / 0.23  | -0.022 / 0.11       | -0.026 / 0.11             | 0.011 / 0.54                  | 0.0099 / 0.51             | -0.001 / 0.94                 | -0.011 / 0.45                 | 0.0022 / 0.88  | 0.02 / 0.17   |
| rs36103207     | T2D, WC, FGLU    | 1.3 / 0.00083              | 1.3 / 0.0018  | 1.2 / 0.048  | 0.1 / 0.0018   | 0.1 / 0.00083       | 0.13 / 0.00055            | 0.013 / 0.75                  | -0.026 / 0.44             | -0.084 / 0.0082               | 0.061 / 0.065                 | 0.073 / 0.028  | 0.03 / 0.36   |
| rs41273264     | TRIG             | 1.2 / 0.0084               | 1.1 / 0.32    | 1 / 0.7      | 0.043 / 0.16   | 0.037 / 0.21        | 0.029 / 0.43              | 0.063 / 0.11                  | 0.038 / 0.23              | -0.077 / 0.011                | 0.13 / 5.2×10 <sup>-5</sup>   | 0.015 / 0.64   | 0.0023 / 0.94 |
| rs41273513     | WC               | 0.76 / 0.024               | 0.7 / 0.0047  | 0.92 / 0.5   | -0.14 / 0.0075 | -0.17 / 0.00045     | 0.038 / 0.5               | 0.032 / 0.61                  | -0.061 / 0.25             | 0.038 / 0.45                  | -0.083 / 0.11                 | -0.069 / 0.2   | -0.053 / 0.31 |

Association results for 45 selected SNPs for all 12 traits analysed in Danish data in stage 2. Data are OR / p-value or beta / p-value. The trait for which each SNP is selected for stage 3 is shown in the Main association column. T2D, type 2 diabetes; WC, waist circumference; FGLU, fasting plasma glucose; FINS, fasting serum insulin; TRIG, fasting triacylglycerol; HDL, high-density lipoprotein cholesterol; BMI, body mass index.
