# Supplementary material for: Exome sequencing-driven discovery of coding polymorphisms associated with common metabolic phenotypes
Source: Springer Nature journal article supplement (doi:10.1007/s00125-012-2756-1), 2012-11-17
Supplement: MOESM28 [file 8091254]

**ESM Table 9 Discovery and replication studies of all 51 associations for 45 SNPs selected for replication**

| Basic information |                |              |                 |            |        |                | Discovery |          |                  |                        | Replication |          |                  |                        | Heterogeneity         |          | Combined |                  |                       |
|-------------------|----------------|--------------|-----------------|------------|--------|----------------|-----------|----------|------------------|------------------------|-------------|----------|------------------|------------------------|-----------------------|----------|----------|------------------|-----------------------|
| Trait             | rs (dbSNP 129) | Chr-Position | Gene            | Annotation |        | Effect / Other | EAF       | <i>n</i> | Estimate         | <i>P</i>               | EAF         | <i>n</i> | Estimate         | <i>P</i>               | <i>I</i> <sup>2</sup> | <i>P</i> | <i>n</i> | Estimate         | <i>P</i>              |
| Type 2 diabetes   | rs7607980      | 2-165259447  | <i>COBL1</i>    | Mis        | N939D  | C/T            | 12.5      | 12177    | 0.80 (0.74-0.87) | 3 × 10 <sup>-7</sup>   | 10.8        | 36407    | 0.88 (0.84-0.93) | 5.4 × 10 <sup>-6</sup> | 0                     | 0.69     | 48584    | 0.86 (0.82-0.9)  | 1.2×10 <sup>-11</sup> |
| Type 2 diabetes   | rs2296172      | 1-39608404   | <i>MACF1</i>    | Mis        | M2290V | G/A            | 23.4      | 12175    | 1.12 (1.05-1.19) | 0.00065                | 21.7        | 63896    | 1.1 (1.06-1.14)  | 5.8 × 10 <sup>-7</sup> | 48                    | 0.017    | 76071    | 1.1 (1.07-1.13)  | 8.2×10 <sup>-10</sup> |
| Type 2 diabetes   | rs60980157     | 9-138355236  | <i>GPSM1</i>    | Mis        | S368L  | T/C            | 24.6      | 12175    | 0.89 (0.84-0.94) | 0.00028                | 23.6        | 33815    | 0.92 (0.87-0.98) | 0.0049                 | -59                   | 0.28     | 45990    | 0.91 (0.87-0.94) | 2.8×10 <sup>-6</sup>  |
| Type 2 diabetes   | rs34882957     | 5-39367651   | <i>C9</i>       | Mis        | P167S  | A/G            | 1         | 12177    | 0.58 (0.44-0.77) | 0.00043                | 0.7         | 31592    | 0.92 (0.74-1.15) | 0.46                   | 0                     | 0.58     | 43769    | 0.78 (0.65-0.92) | 0.0039                |
| Type 2 diabetes   | rs56204700     | 7-97659791   | <i>LMTK2</i>    | Mis        | I693T  | C/T            | 2.2       | 12179    | 1.38 (1.15-1.65) | 0.00076                | 4.6         | 32689    | 1.02 (0.93-1.11) | 0.62                   | 6.8                   | 0.17     | 44868    | 1.08 (1-1.17)    | 0.044                 |
| Type 2 diabetes   | none           | 7-23272666   | <i>GNMB</i>     | Mis        | A354T  | A/G            | 2.2       | 12179    | 1.39 (1.17-1.66) | 0.00055                | 2.1         | 32733    | 1.04 (0.92-1.18) | 0.56                   | 0                     | 0.93     | 44912    | 1.14 (1.03-1.26) | 0.01                  |
| Type 2 diabetes   | none           | 5-133929838  | <i>PHF15</i>    | Mis        | G368V  | T/G            | 1.5       | 12151    | 0.66 (0.52-0.83) | 0.00089                | 2           | 45271    | 0.99 (0.89-1.1)  | 0.88                   | 42                    | 0.033    | 57422    | 0.93 (0.84-1.02) | 0.12                  |
| Type 2 diabetes   | rs28633659     | 1-1844406    | <i>C1orf222</i> | Mis        | E187K  | T/C            | 3.9       | 12179    | 0.76 (0.66-0.87) | 2 × 10 <sup>-4</sup>   | 4.3         | 57180    | 1 (0.93-1.07)    | 0.97                   | 0                     | 0.45     | 69359    | 0.95 (0.89-1.01) | 0.077                 |
| Type 2 diabetes   | rs36103207     | 10-103978255 | <i>ELOVL3</i>   | Mis        | D109N  | A/G            | 3.7       | 12178    | 1.28 (1.12-1.47) | 0.00083                | 4           | 58789    | 0.99 (0.91-1.08) | 0.8                    | -6.4                  | 0.25     | 70967    | 1.06 (0.99-1.14) | 0.098                 |
| Type 2 diabetes   | rs16985907     | 19-59938624  | <i>KIR3DL3</i>  | Mis        | A348P  | C/G            | 4.1       | 12179    | 1.31 (1.15-1.49) | 7.5 × 10 <sup>-5</sup> | 4.5         | 32190    | 0.94 (0.87-1.03) | 0.2                    | 0                     | 0.79     | 44369    | 1.05 (0.98-1.13) | 0.2                   |
| Type 2 diabetes   | none           | 16-25147310  | <i>AQP8</i>     | Mis        | R261Q  | A/G            | 2.4       | 12175    | 0.71 (0.59-0.85) | 0.00038                | 2.3         | 31597    | 1.13 (1-1.27)    | 0.056                  | 45                    | 0.027    | 43772    | 0.98 (0.88-1.08) | 0.61                  |
| Type 2 diabetes   | rs9856575      | 3-52485632   | <i>NISCH</i>    | Mis        | I299V  | G/A            | 2.1       | 12177    | 1.4 (1.17-1.68)  | 0.00055                | 1.8         | 32675    | 0.91 (0.8-1.03)  | 0.15                   | 0                     | 0.67     | 44852    | 1.05 (0.94-1.17) | 0.33                  |
| Obesity           | rs11553746     | 2-262203     | <i>ACP1</i>     | Mis        | T95I   | T/C            | 37.8      | 10324    | 0.89 (0.84-0.94) | 9.4 × 10 <sup>-5</sup> | 36.2        | 23744    | 0.95 (0.91-0.98) | 0.0051                 | 0                     | 0.68     | 34068    | 0.93 (0.9-0.96)  | 3.5×10 <sup>-6</sup>  |
| Obesity           | rs743581       | 15-72115194  | <i>PML</i>      | Mis        | G780V  | T/G            | 37.1      | 10346    | 1.11 (1.05-1.18) | 0.00079                | 37.3        | 16628    | 1.04 (0.99-1.09) | 0.1                    | 0                     | 0.98     | 26974    | 1.07 (1.03-1.11) | 0.00045               |
| Obesity           | none           | 6-41982766   | <i>MED20</i>    | 3'UTR      | NA     | A/C            | 1.6       | 10345    | 0.67 (0.54-0.84) | 0.00085                | 1.4         | 19794    | 0.89 (0.75-1.07) | 0.21                   | 0                     | 0.54     | 30139    | 0.8 (0.7-0.92)   | 0.0015                |
| Obesity           | rs2147439      | 10-11951710  | <i>C10orf47</i> | Mis        | E203K  | A/G            | 1.5       | 10346    | 1.53 (1.22-1.93) | 0.00057                | 1.1         | 25187    | 1.07 (0.89-1.29) | 0.46                   | 0                     | 0.74     | 35533    | 1.24 (1.07-1.43) | 0.0041                |
| Obesity           | none           | 10-132851444 | <i>TCERG1L</i>  | Mis        | G322E  | T/C            | 3.7       | 10346    | 1.37 (1.18-1.59) | 0.00012                | 2.3         | 20766    | 1.04 (0.89-1.21) | 0.6                    | 23                    | 0.1      | 31112    | 1.2 (1.08-1.34)  | 0.0011                |
| Obesity           | rs2425632      | 20-42325348  | <i>GDAP1L1</i>  | Syn        | NA     | T/C            | 4.2       | 10346    | 0.78 (0.68-0.89) | 0.00049                | 4           | 20881    | 0.98 (0.89-1.09) | 0.74                   | 0                     | 0.9      | 31227    | 0.9 (0.84-0.98)  | 0.014                 |

| Basic information      |                |              |                |            |       |                | Discovery |          |                  |                        | Replication |          |                  |          | Heterogeneity         |          | Combined |                  |                      |
|------------------------|----------------|--------------|----------------|------------|-------|----------------|-----------|----------|------------------|------------------------|-------------|----------|------------------|----------|-----------------------|----------|----------|------------------|----------------------|
| Trait                  | rs (dbSNP 129) | Chr-Position | Gene           | Annotation |       | Effect / Other | EAF       | <i>n</i> | Estimate         | <i>P</i>               | EAF         | <i>n</i> | Estimate         | <i>P</i> | <i>i</i> <sup>2</sup> | <i>P</i> | <i>n</i> | Estimate         | <i>P</i>             |
| Obesity                | rs11960429     | 5-180099283  | <i>OR2Y1</i>   | Mis        | R128C | A/G            | 1.2       | 10346    | 0.64 (0.5-0.82)  | 0.00098                | 1.4         | 20027    | 1 (0.84-1.18)    | 0.95     | 0                     | 0.55     | 30373    | 0.87 (0.75-1)    | 0.043                |
| Obesity                | rs12720062     | 2-220148160  | <i>INHA</i>    | Mis        | A257T | A/G            | 2.1       | 10306    | 0.68 (0.56-0.83) | 0.00038                | 1.8         | 16543    | 1 (0.85-1.18)    | 0.99     | 0.1                   | 0.17     | 26849    | 0.85 (0.75-0.97) | 0.016                |
| Obesity                | rs157581       | 19-50087554  | <i>TOMM40</i>  | Syn        | NA    | C/T            | 24.2      | 10344    | 0.89 (0.83-0.95) | 0.00076                | 23          | 16635    | 1.01 (0.96-1.06) | 0.78     | 0                     | 0.44     | 26979    | 0.96 (0.92-1)    | 0.042                |
| Obesity                | rs2240953      | 9-130150713  | <i>SLC27A4</i> | Mis        | G209S | A/G            | 4.2       | 10308    | 1.29 (1.12-1.48) | 0.00073                | 4.5         | 21255    | 0.97 (0.88-1.07) | 0.55     | 0                     | 0.75     | 31563    | 1.07 (0.99-1.16) | 0.11                 |
| Obesity                | none           | 5-14924560   | <i>ANKH</i>    | 5'UTR      | NA    | T/C            | 7.7       | 10346    | 0.83 (0.75-0.92) | 0.00073                | 8           | 16050    | 1 (0.92-1.07)    | 0.91     | 26                    | 0.08     | 26396    | 0.94 (0.88-0.99) | 0.027                |
| BMI                    | rs11553746     | 2-262203     | <i>ACP1</i>    | Mis        | T95I  | T/C            | 37.8      | 14793    | -0.056 (0.012)   | 1.1 × 10 <sup>-5</sup> | 36.5        | 39931    | -0.018 (0.0073)  | 0.014    | 0                     | 0.96     | 54724    | 0.0062 (0.0062)  | 1.2×10 <sup>-5</sup> |
| BMI                    | rs4468717      | 18-3447606   | <i>TGIF1</i>   | Mis        | P163S | T/C            | 7.2       | 14759    | 0.077 (0.021)    | 0.00064                | 7.7         | 9217     | 0.038 (0.027)    | 0.19     | 20                    | 0.052    | 23976    | 0.017 (0.017)    | 0.00047              |
| BMI                    | none           | 21-37003350  | <i>SIM2</i>    | Mis        | A63V  | T/C            | 5.1       | 14827    | -0.095 (0.026)   | 0.00076                | 2.8         | 23195    | -0.022 (0.028)   | 0.61     | -77                   | 0.32     | 38022    | 0.019 (0.019)    | 0.012                |
| BMI                    | rs35739383     | 18-8773835   | <i>CCDC165</i> | Mis        | M242T | T/C            | 39.6      | 14820    | -0.044 (0.012)   | 5 × 10 <sup>-4</sup>   | 39.7        | 21596    | -0.0012 (0.012)  | 0.94     | -28                   | 0.21     | 36416    | 0.0085 (0.0085)  | 0.023                |
| BMI                    | rs2240953      | 9-130150713  | <i>SLC27A4</i> | Mis        | G209S | A/G            | 4.2       | 14776    | 0.12 (0.029)     | 0.00017                | 4.6         | 36610    | -0.0048 (0.02)   | 0.92     | 0                     | 0.66     | 51386    | 0.016 (0.016)    | 0.054                |
| Waist circumference    | rs11553746     | 2-262203     | <i>ACP1</i>    | Mis        | T95I  | T/C            | 37.8      | 14513    | -0.046 (0.011)   | 0.00011                | 36          | 29044    | -0.0043 (0.0083) | 0.5      | 0                     | 0.96     | 43557    | 0.0066 (0.0066)  | 0.0052               |
| Waist circumference    | rs41273513     | 1-156843597  | <i>OR10Z1</i>  | Mis        | I249V | G/A            | 1.5       | 14544    | -0.17 (0.045)    | 0.00045                | 3           | 24134    | 0.0018 (0.026)   | 0.71     | -13                   | 0.26     | 38678    | 0.022 (0.022)    | 0.015                |
| Waist circumference    | rs36103207     | 10-103978255 | <i>ELOVL3</i>  | Mis        | D109N | A/G            | 3.7       | 14545    | 0.1 (0.028)      | 0.00083                | 4.1         | 37186    | 0.003 (0.019)    | 0.68     | 0                     | 0.62     | 51731    | 0.016 (0.016)    | 0.034                |
| Waist circumference    | rs2240953      | 9-130150713  | <i>SLC27A4</i> | Mis        | G209S | A/G            | 4.2       | 14496    | 0.12 (0.027)     | 4.1 × 10 <sup>-5</sup> | 4.8         | 29202    | -0.02 (0.02)     | 0.3      | 0                     | 0.99     | 43698    | 0.016 (0.016)    | 0.13                 |
| Fasting plasma glucose | rs61750009     | 2-219780675  | <i>ZFAND2B</i> | Mis        | P71H  | A/C            | 4.2       | 9080     | -0.12 (0.035)    | 0.00065                | 2.8         | 25560    | -0.044 (0.025)   | 0.12     | 29                    | 0.081    | 34640    | 0.02 (0.02)      | 0.0021               |
| Fasting plasma glucose | none           | 12-51840193  | <i>CSAD</i>    | Mis        | D382N | T/C            | 1         | 9087     | -0.24 (0.069)    | 0.00057                | 1.7         | 24270    | -0.02 (0.032)    | 0.27     | 20                    | 0.12     | 33357    | 0.029 (0.029)    | 0.0062               |
| Fasting plasma glucose | rs16986309     | 19-60401886  | <i>PTPRH</i>   | Mis        | L543F | A/G            | 10.9      | 9087     | -0.077 (0.023)   | 0.00087                | 11.5        | 23231    | -0.0098 (0.013)  | 0.44     | 0                     | 0.93     | 32318    | 0.012 (0.012)    | 0.016                |
| Fasting plasma glucose | rs36103207     | 10-103978255 | <i>ELOVL3</i>  | Mis        | D109N | A/G            | 3.7       | 9086     | 0.13 (0.039)     | 0.00055                | 3.7         | 23254    | 0.016 (0.023)    | 0.61     | -50                   | 0.4      | 32340    | 0.02 (0.02)      | 0.024                |
| Fasting plasma glucose | rs1058065      | 2-27441228   | <i>EIF2B4</i>  | Syn        | NA    | A/G            | 2.1       | 9087     | 0.18 (0.049)     | 3 × 10 <sup>-4</sup>   | 1.9         | 21950    | 9e-04 (0.033)    | 0.96     | -5.3                  | 0.22     | 31037    | 0.028 (0.028)    | 0.046                |
| Fasting plasma glucose | rs41318029     | 10-101580476 | <i>ABCC2</i>   | Mis        | G921S | A/G            | 1.6       | 9087     | 0.19 (0.056)     | 0.00086                | 0.8         | 23319    | 0.0092 (0.049)   | 0.98     | 0                     | 0.85     | 32406    | 0.037 (0.037)    | 0.081                |

| Basic information              |                |              |                 |            |        |                | Discovery |          |                |                        | Replication |          |                |                        | Heterogeneity         |          | Combined |               |                       |
|--------------------------------|----------------|--------------|-----------------|------------|--------|----------------|-----------|----------|----------------|------------------------|-------------|----------|----------------|------------------------|-----------------------|----------|----------|---------------|-----------------------|
| Trait                          | rs (dbSNP 129) | Chr-Position | Gene            | Annotation |        | Effect / Other | EAF       | <i>n</i> | Estimate       | <i>P</i>               | EAF         | <i>n</i> | Estimate       | <i>P</i>               | <i>I</i> <sup>2</sup> | <i>P</i> | <i>n</i> | Estimate      | <i>P</i>              |
| Fasting plasma glucose         | rs34609592     | 9-135905516  | <i>BRD3</i>     | Mis        | A172V  | A/G            | 1.7       | 9087     | 0.19 (0.055)   | 0.00056                | 2.4         | 22049    | -0.01 (0.028)  | 0.88                   | 0                     | 0.62     | 31136    | 0.025 (0.025) | 0.083                 |
| Fasting plasma glucose         | rs1801319      | 11-104330859 | <i>CASP4</i>    | 5'UTR      | NA     | T/C            | 4.3       | 9087     | 0.13 (0.034)   | 0.00019                | 2.9         | 18034    | -0.04 (0.029)  | 0.17                   | 0                     | 0.9      | 27121    | 0.022 (0.022) | 0.3                   |
| Fasting serum insulin          | rs35605687     | 4-2985351    | <i>GRK4</i>     | Mis        | V215I  | A/G            | 14.6      | 8417     | -0.096 (0.022) | 1.1 × 10 <sup>-5</sup> | 20.3        | 17256    | -0.028 (0.014) | 0.059                  | 9.6                   | 0.11     | 25673    | 0.012 (0.012) | 4.8×10 <sup>-5</sup>  |
| Fasting serum insulin          | none           | 6-56588459   | <i>DST</i>      | Mis        | I2589V | C/T            | 3.6       | 8418     | -0.18 (0.042)  | 1.7 × 10 <sup>-5</sup> | 2.2         | 12220    | -0.06 (0.043)  | 0.2                    | 0                     | 0.6      | 20638    | 0.03 (0.03)   | 0.00019               |
| Fasting serum insulin          | rs12434581     | 14-73524572  | <i>ENTPD5</i>   | 5'UTR      | NA     | A/T            | 40.8      | 8413     | -0.064 (0.016) | 5.3 × 10 <sup>-5</sup> | 42.2        | 5135     | -0.012 (0.02)  | 0.55                   | 0                     | 1        | 13548    | 0.012 (0.012) | 0.00038               |
| Fasting serum insulin          | rs41265897     | 1-33608751   | <i>PHC2</i>     | Mis        | A145V  | A/G            | 4         | 8417     | -0.14 (0.039)  | 0.00042                | 4.6         | 18477    | -0.016 (0.025) | 0.55                   | 0                     | 0.37     | 26894    | 0.021 (0.021) | 0.014                 |
| Fasting serum insulin          | none           | 19-8082890   | <i>FBN3</i>     | Mis        | G1311A | G/C            | 2.6       | 8418     | -0.16 (0.049)  | 0.001                  | 1.2         | 18410    | -0.038 (0.048) | 0.46                   | 0                     | 0.56     | 26828    | 0.034 (0.034) | 0.014                 |
| Fasting serum insulin          | none           | 13-112385690 | <i>C13orf35</i> | Mis        | R121W  | T/C            | 1.7       | 8419     | -0.21 (0.059)  | 0.00042                | 4.2         | 18556    | -0.01 (0.026)  | 0.57                   | -0.5                  | 0.14     | 26975    | 0.024 (0.024) | 0.014                 |
| Fasting serum insulin          | rs35118457     | 17-37516926  | <i>DHX58</i>    | Mis        | R95Q   | T/C            | 5.8       | 8418     | 0.11 (0.033)   | 9 × 10 <sup>-4</sup>   | 4.4         | 17195    | 0.0085 (0.026) | 0.76                   | -27                   | 0.21     | 25613    | 0.021 (0.021) | 0.032                 |
| Fasting serum insulin          | rs41289373     | 6-151714763  | <i>AKAP12</i>   | Mis        | A1182T | A/G            | 1.3       | 8381     | -0.26 (0.065)  | 9 × 10 <sup>-5</sup>   | 1.1         | 18547    | 0.039 (0.048)  | 0.44                   | 0                     | 0.52     | 26928    | 0.039 (0.039) | 0.12                  |
| Fasting plasma HDL-cholesterol | none           | 17-39281652  | <i>CD300LG</i>  | Mis        | R82C   | T/C            | 3.5       | 13063    | -0.18 (0.032)  | 7.2 × 10 <sup>-8</sup> | 3.1         | 20822    | -0.14 (0.027)  | 1.5 × 10 <sup>-7</sup> | 0                     | 0.85     | 33885    | 0.02 (0.02)   | 8.5×10 <sup>-14</sup> |
| Fasting plasma HDL-cholesterol | none           | 5-149340823  | <i>SLC26A2</i>  | Mis        | R492W  | T/C            | 2.1       | 13060    | -0.18 (0.039)  | 1.5 × 10 <sup>-5</sup> | 2.2         | 18804    | 0.0063 (0.033) | 0.75                   | 2.6                   | 0.19     | 31864    | 0.025 (0.025) | 0.011                 |
| Fasting plasma triacylglycerol | rs41273264     | 6-31708085   | <i>PRRC2A</i>   | Mis        | S1219Y | A/C            | 4.2       | 13326    | 0.13 (0.03)    | 5.2 × 10 <sup>-5</sup> | 2.2         | 16135    | 0.1 (0.037)    | 0.0093                 | -22                   | 0.29     | 29461    | 0.023 (0.023) | 3.4×10 <sup>-6</sup>  |

Estimates are OR (95% CI) for binary variables (type 2 diabetes and obesity) or beta (standard error) on a rank normalized scale for quantitative traits (Fasting plasma HDL-cholesterol, fasting plasma triacylglycerol, fasting plasma glucose and BMI). Reported estimates are based on replication (stage 3) data. Estimates of effects and *P*-values for binary traits in replication and combined meta-analyses were calculated based on effect size and standard error, where effect size was weighted according to the estimated standard errors by using the inverse corresponding standard error. For quantitative traits an overall z-statistics was calculated relative to each reference allele estimated based on *P*-value and direction of effect adjusted for the number of individuals in each sample. Heterogeneity was calculated including only the replication samples. Alleles are given on the positive strand. rs-numbers are from dbSNP 129. Chromosome and position for SNPs are stated according to Build 36.3 (hg18). Chr: chromosome; EAF: Effect allele frequency.
