# Supplementary material for: Exome sequencing-driven discovery of coding polymorphisms associated with common metabolic phenotypes
Source: Springer Nature journal article supplement (doi:10.1007/s00125-012-2756-1), 2012-11-17
Supplement: MOESM29 [file 8091254]

**ESM Table 10 In silico replication in existing GWAS meta-analysis databases for eight associations with nominal replication in stage 3 data.**

| Trait                         | rs (dbSNP 129) | Chr-Position (build 36) | Gene           | EAF (%) | Proxy ( $r^2$ ) | N      | Effect/P                       | Consistent direction | Reason for missing results |
|-------------------------------|----------------|-------------------------|----------------|---------|-----------------|--------|--------------------------------|----------------------|----------------------------|
| Fasting serum HDL-cholesterol | None           | 17-39281652             | <i>CD300LG</i> | 3.5     |                 |        |                                |                      | No proxy                   |
| Type 2 diabetes               | rs7607980      | 2-165259447             | <i>COBLL1</i>  | 12.5    |                 | 22570  | 0.93 (0.87-0.99),<br>$P=0.016$ | Y                    |                            |
| Type 2 diabetes               | rs2296172      | 1-39608404              | <i>MACF1</i>   | 23.4    |                 | 22570  | 1.06 (1.01-1.11),<br>$P=0.016$ | Y                    |                            |
| Type 2 diabetes               | rs60980157     | 9-138355236             | <i>GPSM1</i>   | 24.6    |                 |        |                                |                      | No proxy                   |
| Fasting serum triacylglycerol | rs41273264     | 6-31708085              | <i>PRRC2A</i>  | 4.2     |                 |        |                                |                      | No proxy                   |
| Obesity                       | rs11553746     | 2-262203                | <i>ACP1</i>    | 37.8    |                 |        |                                |                      | No data for this trait     |
| BMI                           | rs11553746     | 2-262203                | <i>ACP1</i>    | 37.8    | rs3791221 (1)   | 123842 | $P=0.093$                      | Y                    |                            |

Due to a minor overlap in samples between stage 3 and the GWAS meta-analysis data these data were not meta-analysed with stage 2 and stage 3 data and consequently they represent semi-independent replication. Data for type 2 diabetes were contributed by the DIAGRAM Consortium [27], data on BMI by GIANT Consortium [28] ([http://www.broadinstitute.org/collaboration/giant/index.php/GIANT\\_consortium](http://www.broadinstitute.org/collaboration/giant/index.php/GIANT_consortium)) and data on glycaemic traits were contributed by MAGIC investigators [29] and were downloaded from [www.magicinvestigators.org](http://www.magicinvestigators.org). For two SNPs the lead SNPs were in the GWAS meta-analyses data while *in silico* replication for two SNPs was based on proxies. Here LD was estimated from data from the 1000 Genomes Project. Three SNPs had no good proxy ( $r^2 > 0.4$ ). For one trait no GWAS data could be investigated.
