# Supplementary material for: Exome sequencing-driven discovery of coding polymorphisms associated with common metabolic phenotypes
Source: Springer Nature journal article supplement (doi:10.1007/s00125-012-2756-1), 2012-11-17
Supplement: MOESM30 [file 8091254]

**ESM Table 11 Pleiotropic effects of SNPs associated with a metabolic phenotype in the main analysis**

|                                        | chr17_39281652                | rs7607980                     | rs2296172                     |
|----------------------------------------|-------------------------------|-------------------------------|-------------------------------|
| Locus                                  | <i>CD300LG</i>                | <i>COBLL1</i>                 | <i>MACF1</i>                  |
| Lead Trait                             | HDL-cholesterol               | Type 2 diabetes               | Type 2 diabetes               |
|                                        | <i>n</i> / $\beta$ / <i>p</i> | <i>n</i> / $\beta$ / <i>p</i> | <i>n</i> / $\beta$ / <i>p</i> |
| Type 2 diabetes                        | 50167 / 1 / 0.44              | 48584 / 0.88 / 1.2e-11        | 76071 / 1.1 / 8.2e-10         |
| Obesity                                | 34203 / 0.97 / 0.97           | 33109 / 1.1 / 0.29            | 43166 / 1 / 0.021             |
| BMI (kg/m <sup>2</sup> )               | 54931 / -0.02 / 0.75          | 52981 / 0.045 / 0.0069        | 70764 / 0.0016 / 0.19         |
| Waist-to-hip ratio                     | 10836 / 0.02 / 0.48           | 10834 / -0.038 / 0.016        | 10831 / 0.014 / 0.28          |
| Waist circumference (cm)               | 43744 / -0.034 / 0.73         | 42050 / 0.02 / 0.83           | 56677 / 0.0079 / 0.054        |
| Height (cm)                            | 15558 / 0.06 / 0.016          | 15557 / 0.0073 / 0.59         | 15554 / 0.016 / 0.13          |
| Fasting serum insulin (pM)             | 26908 / 0.034 / 0.14          | 25461 / -0.029 / 0.057        | 26831 / 0.003 / 0.4           |
| 30 min. serum insulin (pM)             | 5277 / 0.0093 / 0.86          | 5275 / -0.0074 / 0.8          | 5274 / 0.04 / 0.091           |
| 120 min. serum insulin (pM)            | 5330 / 0.035 / 0.5            | 5328 / -0.031 / 0.28          | 5327 / 0.032 / 0.17           |
| Fasting plasma glucose (mM)            | 34572 / -0.013 / 0.91         | 33094 / 0.013 / 0.14          | 34452 / 0.016 / 0.0072        |
| 30 min. plasma glucose (mM)            | 5472 / 0.086 / 0.085          | 5470 / 0.035 / 0.19           | 5469 / 0.031 / 0.16           |
| 120 min. plasma glucose (mM)           | 5761 / 0.029 / 0.57           | 5759 / -0.044 / 0.11          | 5758 / 0.043 / 0.055          |
| ISI Matsuda                            | 5813 / -0.061 / 0.23          | 5811 / 0.014 / 0.61           | 5811 / -0.057 / 0.011         |
| HOMA-IR (mU/L $\times$ mM)             | 8414 / 0.038 / 0.37           | 8412 / -0.016 / 0.48          | 8412 / 0.029 / 0.11           |
| BIGTT-SI                               | 4906 / -0.046 / 0.38          | 4904 / 0.018 / 0.53           | 4904 / -0.043 / 0.062         |
| Insulinogenic index                    | 5089 / -0.0086 / 0.87         | 5087 / -0.0062 / 0.83         | 5087 / 0.023 / 0.33           |
| BIGTT-AIR                              | 4897 / -0.035 / 0.52          | 4895 / -0.044 / 0.14          | 4895 / 0.011 / 0.64           |
| HbA1C (%)                              | 12377 / 0.024 / 0.51          | 12375 / -0.046 / 0.021        | 12374 / 0.029 / 0.065         |
| Fasting serum triacylglycerol (mmol/l) | 35765 / 0.12 / 1.8e-08        | 34624 / -0.0053 / 0.057       | 35674 / 0.0086 / 0.2          |
| Fasting serum cholesterol (mmol/l)     | 13183 / -0.034 / 0.34         | 13181 / -0.00071 / 0.97       | 13179 / -0.025 / 0.096        |
| Fasting serum HDL-cholesterol (mmol/l) | 33885 / -0.14 / 8.5e-14       | 32758 / 0.0033 / 0.0056       | 33811 / -0.037 / 3.6e-06      |
| Systolic blood pressure (mmHg)         | 12651 / 0.00013 / 1           | 12649 / -0.026 / 0.17         | 12648 / 0.013 / 0.39          |
| Diastolic blood pressure (mmHg)        | 12650 / 0.0089 / 0.79         | 12648 / 0.0031 / 0.87         | 12647 / 0.019 / 0.18          |
| Leptin (unit)                          | 5396 / 0.038 / 0.39           | 5394 / 0.038 / 0.11           | 5393 / -0.0046 / 0.81         |
| Adiponectin (unit)                     | 5483 / -0.045 / 0.37          | 5481 / 0.059 / 0.029          | 5480 / -0.029 / 0.19          |
| hs-CRP (unit)                          | 5233 / 0.066 / 0.22           | 5231 / -0.0098 / 0.74         | 5230 / 0.024 / 0.31           |

Data are *N* / effect / *P*-value. Effects of quantitative traits are on a rank normalized scale while effects for binary traits (type 2 diabetes and obesity) are odds ratio. Association analysis for each single SNP was performed in largest possible sample size available. Study samples included are all samples described in ESM Methods section 0. Lead trait describes the metabolic phenotype for which main association is found (Table 2). Statistical analyses within each study sample were done as described in section 3.3. Meta-analysis of several study samples were done as described in section 4.2. Derived indices of insulin secretion are Insulinogenic Index (calculated as: serum insulin[pM]<sub>30 min</sub> – serum insulin[pM]<sub>0min</sub>)/plasma glucose[mM]<sub>30 min</sub>) and BIGTT-acute insulin response (AIR) [30]. Derived indices of insulin resistance are homeostasis model assessment of insulin resistance (HOMA-IR) [31], Insulin Sensitivity Index (ISI) Matsuda [32] and BIGTT-sensitivity index (SI) [30]. Hs-CRP: high sensitivity C-reactive protein
